# Supplementary material for: Carotid artery intima–media thickness, distensibility and elasticity: population epidemiology and concordance in Australian children aged 11–12 years old and their parents
Source: PubMed Central journal article supplement — BMJ Open. 2019 Jul 4;9(Suppl 3):23–33. doi: 10.1136/bmjopen-2017-020264 (PMC6624035; doi:10.1136/bmjopen-2017-020264), 2019-07-04
Supplement: bmjopen-2017-020264.draft_revisions.pdf [file bmjopen-2017-020264.draft_revisions.pdf]

# BMJ Open

BMJ Open is committed to open peer review. As part of this commitment we make the peer review history of every article we publish publicly available.

When an article is published we post the peer reviewers' comments and the authors' responses online. We also post the versions of the paper that were used during peer review. These are the versions that the peer review comments apply to.

The versions of the paper that follow are the versions that were submitted during the peer review process. They are not the versions of record or the final published versions. They should not be cited or distributed as the published version of this manuscript.

BMJ Open is an open access journal and the full, final, typeset and author-corrected version of record of the manuscript is available on our site with no access controls, subscription charges or pay-per-view fees (<http://bmjopen.bmj.com>).

If you have any questions on BMJ Open's open peer review process please email [info.bmjopen@bmj.com](mailto:info.bmjopen@bmj.com)

# BMJ Open

## Carotid artery intima-media thickness, distensibility, and elasticity: Population epidemiology and concordance in Australian 11-12 year old children and their parents

|                                 |                                                                                                                                                                                                                                                                                                                                                                                                                                                                                                                                                                                                                                                                                                                                                                                                                                                                                                                                                                                                                              |
|---------------------------------|------------------------------------------------------------------------------------------------------------------------------------------------------------------------------------------------------------------------------------------------------------------------------------------------------------------------------------------------------------------------------------------------------------------------------------------------------------------------------------------------------------------------------------------------------------------------------------------------------------------------------------------------------------------------------------------------------------------------------------------------------------------------------------------------------------------------------------------------------------------------------------------------------------------------------------------------------------------------------------------------------------------------------|
| Journal:                        | <i>BMJ Open</i>                                                                                                                                                                                                                                                                                                                                                                                                                                                                                                                                                                                                                                                                                                                                                                                                                                                                                                                                                                                                              |
| Manuscript ID                   | bmjopen-2017-020264                                                                                                                                                                                                                                                                                                                                                                                                                                                                                                                                                                                                                                                                                                                                                                                                                                                                                                                                                                                                          |
| Article Type:                   | Research                                                                                                                                                                                                                                                                                                                                                                                                                                                                                                                                                                                                                                                                                                                                                                                                                                                                                                                                                                                                                     |
| Date Submitted by the Author:   | 24-Oct-2017                                                                                                                                                                                                                                                                                                                                                                                                                                                                                                                                                                                                                                                                                                                                                                                                                                                                                                                                                                                                                  |
| Complete List of Authors:       | Liu, Richard; The University of Melbourne, Department of Paediatrics; Murdoch Children's Research Institute<br>Dunn, Sophie; Murdoch Children's Research Institute; Royal Children's Hospital, Emergency Department<br>Grobler, Anneke; Murdoch Children's Research Institute<br>Lange, Katherine; Murdoch Children's Research Institute<br>Becker, Denise; Murdoch Children's Research Institute; University of Melbourne, Melbourne School of Population and Global Health<br>Goldsmith, Greta ; Murdoch Children's Research Institute<br>Carlin, John; Murdoch Children's Research Institute; University of Melbourne, Melbourne School of Population and Global Health<br>Juonala, Markus; University of Turku, Department of Medicine; Turku University Hospital, Division of Medicine<br>Wake, Melissa; Murdoch Children's Research Institute; The University of Melbourne, Department of Paediatrics<br>Burgner, David; Murdoch Children's Research Institute; The University of Melbourne, Department of Paediatrics |
| <b>Primary Subject Heading</b>: | Epidemiology                                                                                                                                                                                                                                                                                                                                                                                                                                                                                                                                                                                                                                                                                                                                                                                                                                                                                                                                                                                                                 |
| Secondary Subject Heading:      | Paediatrics, Public health, Cardiovascular medicine, Radiology and imaging                                                                                                                                                                                                                                                                                                                                                                                                                                                                                                                                                                                                                                                                                                                                                                                                                                                                                                                                                   |
| Keywords:                       | Intima-media thickness, Distensibility, Reference values, Children, Inheritance patterns, Epidemiological studies                                                                                                                                                                                                                                                                                                                                                                                                                                                                                                                                                                                                                                                                                                                                                                                                                                                                                                            |
|                                 |                                                                                                                                                                                                                                                                                                                                                                                                                                                                                                                                                                                                                                                                                                                                                                                                                                                                                                                                                                                                                              |

SCHOLARONE™  
Manuscripts

1  
2  
3 **Carotid artery intima-media thickness, distensibility, and elasticity: Population**  
4 **epidemiology and concordance in Australian 11-12 year old children and their parents**  
5  
6

7 **Authors:** Richard S Liu,<sup>\*1,2</sup> Sophie Dunn,<sup>\*2,3</sup> Anneke Grobler,<sup>2</sup> Katherine Lange,<sup>2</sup> Denise  
8 Becker,<sup>2,4</sup> Greta Goldsmith,<sup>2</sup> John Carlin,<sup>2,4</sup> Markus Juonala,<sup>5,6</sup> Melissa Wake,<sup>1,2,7</sup> David P  
9 Burgner<sup>1,2,8</sup>  
10  
11

12 \* RS Liu and S Dunn contributed equally to the study  
13  
14

15 **Affiliations:** <sup>1</sup>Department of Paediatrics, Faculty of Medicine, Dentistry and Health Services,  
16 The University of Melbourne, Parkville, VIC, Australia; <sup>2</sup>Murdoch Children's Research  
17 Institute, Royal Children's Hospital, Parkville, VIC, Australia; <sup>3</sup>Emergency Department,  
18 Royal Children's Hospital, Parkville, VIC, Australia, <sup>4</sup>Melbourne School of Population and  
19 Global Health, Faculty of Medicine, Dentistry and Health Services, University of Melbourne,  
20 Parkville, VIC, Australia; <sup>5</sup>Department of Medicine, University of Turku, Turku, Finland;  
21 <sup>6</sup>Division of Medicine, Turku University Hospital, Turku, Finland; <sup>7</sup>Department of  
22 Paediatrics and the Liggins Institute, The University of Auckland, Auckland, New Zealand;  
23 <sup>8</sup>Department of Paediatrics, Monash University, Melbourne, VIC, Australia  
24  
25  
26  
27  
28  
29  
30  
31

32 **Correspondence to:** Professor Melissa Wake  
33 Murdoch Children's Research Institute  
34 The Royal Children's Hospital  
35 50 Flemington Road, Parkville VIC 3052, AUSTRALIA  
36 T: +61 3 9345 5761  
37 E: [melissa.wake@mcri.edu.au](mailto:melissa.wake@mcri.edu.au)  
38  
39  
40  
41  
42

43 **Keywords:** intima-media thickness, distensibility, elasticity, reference values, parents,  
44 children, inheritance patterns, correlation studies, epidemiologic studies, cross-sectional  
45 studies  
46  
47  
48  
49

50 **Word count:** 2144 + 96 + 303 + 1021 = 3564  
51  
52  
53  
54  
55  
56  
57  
58  
59  
60

1  
2  
3 **Abbreviations:** BMI: body mass index; CC: Pearson's correlation coefficient ; CDC: Centers  
4 for Disease Control and Prevention; CheckPoint: Child Health CheckPoint; CI: confidence  
5 interval ;CVD: cardiovascular disease; Disadvantage Index: The Index of Relative  
6 Socioeconomic Disadvantage; ECG: electrocardiogram; ERC: estimated regression coefficient;  
7  
8 IMT: intima-media thickness; IQR: Interquartile Range; LD: lumen diameter; LSAC:  
9 Longitudinal Study of Australian Children; MCRI: The Murdoch Children's Research  
10 Institute; MHz: megahertz; mm millimetres; SD: standard deviation; VD: vessel diameter  
11  
12  
13  
14  
15  
16  
17  
18  
19  
20  
21  
22  
23  
24  
25  
26  
27  
28  
29  
30  
31  
32  
33  
34  
35  
36  
37  
38  
39  
40  
41  
42  
43  
44  
45  
46  
47  
48  
49  
50  
51  
52  
53  
54  
55  
56  
57  
58  
59  
60

## ABSTRACT

**Objectives:** To describe a well-established marker of cardiovascular risk, carotid intima-media thickness (IMT), and related measures (artery distensibility and elasticity) in 11-12-year-old children and mid-life adults, and examine associations within parent-child dyads.

**Design:** Cross-sectional study (Child Health CheckPoint), nested within a prospective cohort study, the Longitudinal Study of Australian Children (LSAC).

**Setting:** Assessment centres in six Australian capital cities and eight selected regional towns, Feb 2015-Mar 2016.

**Participants:** Of all participating CheckPoint families (n=1874), 1489 children (50.0% girls) and 1476 parents (86.8% mothers) with carotid IMT data were included. Survey weights and methods were applied to account for LSAC's complex sample design and clustering within postcodes and strata.

**Outcome measures:** Ultrasound of the right carotid artery was performed using standardised protocols. Primary outcomes were mean and maximum far-wall carotid IMT, quantified using semi-automated edge-detection software. Secondary outcomes were carotid artery distensibility and elasticity. Pearson's correlation coefficients and multivariable linear regression models were used to assess parent-child concordance. Random effects modelling on a subset of ultrasounds (with repeated measurements) were used to assess reliability of the child carotid IMT measure.

**Results:** The average mean and maximum child carotid IMT were 0.50mm (standard deviation, SD (0.06) and 0.58mm (SD 0.05) respectively. In adults, average mean and maximum carotid IMT were 0.57mm (SD 0.07) and 0.66mm (SD 0.10) respectively. Mother-child correlations for mean and maximum carotid IMT were 0.12 (95% CI 0.05 to 0.23) and 0.10 (95% CI 0.03 to 0.21) respectively. For carotid artery distensibility and elasticity, mother-child correlations were 0.19 (95% CI 0.10 to 0.25) and 0.11 (95% CI 0.02 to 0.18), respectively. There was no strong evidence of father-child correlation in any measure.

**Conclusions:** We provide Australian values for carotid vascular measures, and report a modest mother-child concordance. Both genetic and environmental exposures are likely to contribute to carotid IMT.

**Strengths and limitations of this study**

- This is the largest cross-sectional study to investigate carotid IMT concordance in parent-child dyads
- Population-based sampling of children provides an additional Australian reference for future studies investigating carotid IMT
- Our study sample contained a large proportion of mothers, limiting generalisability of our concordance findings for fathers

For peer review only

## INTRODUCTION

Atherosclerosis has a long pre-clinical latency that begins in early life; this affords multiple opportunities for early prevention and intervention.<sup>1 2</sup> Traditional cardiovascular disease (CVD) risk factors are predictive of outcomes in adults, but do not capture the total risk.<sup>3</sup> Widely-used CVD screening tools for adults (such as the Framingham Risk Score) predict only 60-65% of CVD risk,<sup>3</sup> and CVD events increasingly occur in many who have no traditional risk factors.<sup>4</sup> Non-invasive risk assessment, such as carotid intima-media thickness (IMT), may facilitate earlier intervention<sup>5</sup> by improving CVD risk prediction and stratification for intermediate-risk individuals.<sup>3</sup>

Carotid IMT is a non-invasive ultrasound technique that measures the thickness of the intimal and medial layers of the carotid artery. It is a marker of early subclinical total atherosclerotic burden.<sup>6-11</sup> Pignoli *et al*<sup>12</sup> first demonstrated B-mode ultrasound-assisted measurement of the intima and media layers of the carotid artery, *in vivo* at the time of autopsy, reflecting the direct measurement of atherosclerotic burden at that site. The extent of coronary artery atherosclerosis also correlated with carotid IMT in a large clinical population of high risk individuals.<sup>13 14</sup> Carotid IMT reflect the burden of multiple cardiovascular risk factors,<sup>15</sup> predict future cardiovascular events (including stroke and myocardial infarction),<sup>16-18</sup> and has the potential to be used as a CVD screening tool in addition to existing risk scores.<sup>3 19</sup>

Functional artery measurements may also provide a sensitive marker of CVD risk. In adults, decreased arterial distensibility and elasticity have been observed in hypertensive patients<sup>20</sup> and those with diabetes,<sup>21</sup> but their use in stroke and myocardial infarction are of uncertain value.

Few studies have examined the distribution of carotid IMT and related vascular measures, such as arterial distensibility and elasticity, in children. One of the largest studies to date<sup>22</sup> assessed 1155 children aged between 6-18 years and developed sex-specific reference charts normalised to age and height. Given the lack of outcome data linking childhood artery parameters with adult CVD, the meaning of these reference values remains uncertain. Nonetheless, functional and structural measures of vascular health as predictors of CVD may be particularly important for children because of the greater potential for reducing atherosclerosis by modifying CVD risk factors early in life.<sup>23-25</sup>

The relative contribution of shared and unshared factors to carotid artery parameters has important implications for the design of interventions to modify CVD risk. Parent-child concordance is a unique opportunity to add additional important information in the

1  
2  
3 calculation of these relative contributions, leveraging the unique genetic and environmental  
4 exposures parents and their children share. Carotid IMT is known to be modestly heritable,  
5 however estimates are largely derived from studies of twins<sup>26</sup> or older participants.<sup>27 28</sup> One  
6 study reported modest parent-child heritability ( $h^2 < 30\%$ ).<sup>29</sup> Understanding parent-child  
7 concordance in a larger population based cohort could clarify sex differences and examine  
8 the generalisability of earlier findings.  
9  
10

11  
12  
13 The Child Health CheckPoint nested within *Growing Up in Australia* (also known as the  
14 Longitudinal Study of Australian Children, LSAC) offers a unique opportunity to report  
15 cross-sectional carotid artery phenotypes in Australian parent-child dyads measured on the  
16 same day using the same protocols. We aimed to (1) describe, in 11-12-year-old Australian  
17 children and their parents, the distribution of carotid IMT and related measures (artery  
18 distensibility and elasticity), and (2) to analyse parent-child concordance. In addition, we use  
19 repeated readings on a subset of child films by both the same and a different rater to estimate  
20 the magnitude of measurement error in carotid IMT readings.  
21  
22  
23  
24  
25  
26

## 27 METHODS

28  
29 **Study Design and Participants:** Details of the initial study design and recruitment are  
30 outlined elsewhere.<sup>30</sup> Briefly, LSAC recruited a nationally representative B cohort of 5107  
31 infants<sup>31</sup> using a 2-stage cluster randomised design, and followed them up in biennial 'waves'  
32 of data collection up to 2015. The initial recruitment rate in 2004 was 57.2%, of whom 73.7%  
33 (n=3764) were retained to LSAC wave 6 in 2014.  
34  
35  
36

37  
38 At the wave 6 visit, all contactable and consenting families (n=3513) were invited to consent  
39 to their contact details being shared with the Child Health CheckPoint team. In 2015,  
40 families that consented were then sent an information pack via post and received an  
41 information and recruitment phone call. The CheckPoint's detailed cross-sectional  
42 biophysical assessment (the Child Health CheckPoint), nested between LSAC waves 6 and 7  
43 (aged 11-12 years), took place between February 2015 and March 2016 (see detailed  
44 description of CheckPoint methods<sup>30</sup>). 1874 families participated.  
45  
46  
47  
48

49  
50 **Ethics and Consent:** The CheckPoint data collection protocol was approved by The Royal  
51 Children's Hospital (Melbourne, Australia) Human Research Ethics Committee (33225D)  
52 and The Australian Institute of Family Studies Ethics Committee (14-26). The attending  
53 parents/caregivers provided written informed consent for themselves and their children to  
54 participate in the study.  
55  
56  
57  
58  
59  
60



1  
2  
3 **Procedure:** Carotid IMT, lumen diameter, height, weight and puberty status were collected  
4 at a specialised 3.5 hour (capital and large cities) or 2.5 hour (smaller regional centres)  
5 CheckPoint assessment centre visit. Those families (n=378) who could not arrange a visit  
6 were offered a home visit with a reduced protocol excluding carotid ultrasound; their data are  
7 not included (figure 1). Participating families were included in the current analyses if carotid  
8 artery data from CheckPoint were available (figure 1). Parents were excluded from  
9 correlation analyses if they were non-biological caregivers.  
10  
11  
12  
13

14 Participants underwent carotid ultrasound, vascular stiffness assessment, and blood pressure  
15 measurement in a specialised 15-min station (called “Heart Lab”), which was within the first  
16 hour of arrival at the assessment centre visit. Participants were semi-fasted and ultrasound  
17 assessment was performed prior to exercise testing and salbutamol administration (part of the  
18 respiratory function assessment).  
19  
20  
21  
22

23 **Carotid artery ultrasound:** Carotid artery images were acquired using standardised  
24 protocols developed in accordance with recommendations of the American Society of  
25 Echocardiography and Mannheim Consensus statements.<sup>18 32</sup> All participants lay supine with  
26 their head turned 45 degrees to the left to expose the right side of neck. The right carotid  
27 artery was chosen to harmonise with other vascular measures taken in Heart Lab, such as  
28 pulse wave velocity, which also assessed the right-sided circulation. Ultrasound images were  
29 obtained using a portable ultrasound machine and 10 megahertz (MHz) linear array probe  
30 (Vivid-I, GE Healthcare, Chicago, IL, USA). The angle of imaging was chosen, in the  
31 absence of a Meijer Carotid Arc, at approximately 45 degrees to the midline and adjusted  
32 according to image quality. Images were generally acquired at an angle such that the  
33 overlying internal jugular vein lay between the artery and the probe as this produced the  
34 highest quality image. The duration of the captured real-time B-mode ultrasound cine-loops  
35 were 10 cardiac cycles. These were captured in triplicate by one of four trained technicians.  
36 We used a modified 3-lead electrocardiogram (ECG) to record heart rhythm concurrently.  
37  
38  
39  
40  
41  
42  
43  
44  
45

46 **Image processing and quality:** All images were reviewed by one technician to select loops  
47 that met key optimisation parameters: a clear near and far wall intima-media, clear lumen,  
48 straight vessel, presence of the carotid bulb and an ECG trace. The best quality 5-7 cardiac  
49 cycle section of the loops were trimmed and extracted. Quality of the trimmed images were  
50 graded for wall clarity; length of clarity; position of clarity relative to carotid bulb; clear  
51 lumen; and straightness of vessel, on a subjective 1-4 scale.  
52  
53  
54  
55  
56  
57  
58  
59  
60

1  
2  
3 **Mean and maximum carotid intima-media thickness:** These loops were further processed  
4 using Carotid Analyzer (Medical Imaging Applications, Coralville, IA, USA), a  
5 commercially available semi-automatic edge detection software program. Raters calibrated  
6 the images using ultrasound image markers. Intima-media thickness was measured – at the  
7 vessel region of highest quality, approximately 10mm (millimetres) from the carotid bulb –  
8 using the software’s semi-automated measurement protocol. After algorithmic detection of  
9 the intima-media interface over the entire cine-loop, frames were manually adjusted as  
10 needed or rejected if the intima-media interface was unclear or blurred.  
11  
12  
13  
14  
15

16 Three to five frames, at end-diastole (R wave on the ECG) from the entire cine-loop of  
17 images, were selected for analysis. Carotid IMT values were presented as the mean of 3-5  
18 still frames of IMT. We presented both ‘mean’ carotid IMT measurements, which referred to  
19 the 3-5 frame average of the average carotid IMT over the 5-10mm section, as well as  
20 ‘maximum’ carotid IMT, which refer to the 3-5 frame average of the thickest point of carotid  
21 IMT measurement over the 5-10 mm section.  
22  
23  
24  
25

26 **Vessel and lumen diameter:** Minimal vessel diameter at end diastole was calculated as the  
27 average media-media distance on each of the 3-5 still frames used to calculate mean and  
28 maximum carotid IMT. Lumen diameter was calculated by measuring the average intima-  
29 intima distance (subtracting near and far wall IMT measurements).  
30  
31  
32

33 **Reliability of child carotid IMT readings:** Six trained raters analysed all cine-loops.  
34 Training consisted of 30 example cine-loops that were subsequently assessed for consistency  
35 by an expert rater (RL). Inter- and intra-rater reliability was assessed by reanalysing a subset  
36 of 105 randomly-selected images four times at the end of the scoring process. Images were  
37 reassessed twice each by two raters in a balanced incomplete block design as not all raters  
38 assessed the complete subset. This allowed estimation of the repeatability of measurements  
39 made by the same rater and the reproducibility of measurements made by different raters.  
40 Image acquisition was only performed once.  
41  
42  
43  
44  
45  
46

47 **Other carotid arterial measures:** Further measures of carotid artery distensibility and  
48 elasticity were calculated from carotid artery images as follows.  
49

50 Carotid arterial distensibility (%) was calculated as previously described,<sup>33</sup> automatically  
51 from Carotid Analyzer, based on maximum and minimum media-media vessel diameter (VD)  
52 frame pairs in the cine-loop:  
53  
54

$$\frac{VD_{max} - VD_{min}}{VD_{min}} \times 100\%$$

1  
2  
3 Carotid arterial elasticity (%/mmHg) was derived using intima-intima lumen diameter (LD),  
4 according to previously published work from the Cardiovascular Risk in Young Finns  
5 Study<sup>34 35</sup> and other related studies:<sup>33</sup>

$$\frac{\left(\frac{LD_{max} - LD_{min}}{LD_{min}}\right)}{\Delta P} \times 100\%$$

10  
11 Measurements of VD and LD were automated and rater-independent.

12  
13 **Other sample characteristics:** Measurement of other sample characteristics are outlined in  
14 detail elsewhere.<sup>30</sup> Briefly, age was calculated to nearest week using date of birth, either  
15 imported from Medicare Australia's enrolment database (child) or self-reported (parent), and  
16 date of assessment. Sex and pubertal stage were self-reported; puberty was further  
17 categorised into prepubertal, early pubertal, midpubertal, late pubertal, and postpubertal  
18 stages using the Pubertal Development Scale.<sup>36</sup> We considered any child who was in the early  
19 pubertal category or above as having started puberty.

20  
21 Anthropomorphic measurements were taken as previously described.<sup>30</sup> Body mass index  
22 (BMI) was calculated as weight (kg) divided by height (m) squared. For children, an age- and  
23 sex-adjusted BMI z-score was calculated using the US Centers for Disease Control and  
24 Prevention (CDC) growth reference charts.<sup>37</sup> Blood pressure was measured via SphygmoCor  
25 XCEL (AtCor Medical Pty Ltd., West Ryde, NSW, Australia). Following seven minutes in  
26 supine position at rest, systolic and diastolic blood pressures were measured at the brachial  
27 artery up to three times, with mean values reported.

28  
29 Socio-Economic Indexes for Areas scores of the postcode region where the participating  
30 family lived were used as a measure of neighbourhood socioeconomic position. The Index of  
31 Relative Socioeconomic Disadvantage (Disadvantage Index) was a standardised score by  
32 geographic area compiled from 2011 Australian Census data, to numerically summarise the  
33 social and economic conditions of Australian neighbourhoods (national mean of 1000 and a  
34 standard deviation (SD) of 100, where higher values represent less disadvantage).<sup>38</sup>

1  
2  
3 **Statistical analysis:** Concordance between parents and children was assessed by: 1)  
4 Pearson's correlation coefficients with 95% confidence intervals; and 2) linear regression  
5 with child variable as dependent variable and parent variable as independent variable. Linear  
6 regression models were adjusted for parent and child age, parent and child height, child  
7 lumen diameter, Disadvantage Index, and parent and child sex, in models including both  
8 sexes. In addition, the Pearson's correlation coefficient and linear regression analyses were  
9 repeated using weighted multi-level survey analyses, and became the main reported analyses.  
10  
11  
12  
13

14 Population summary statistics and proportions were estimated by applying survey weights  
15 and survey procedures that corrected for sampling, participation and non-response biases, and  
16 took into account clustering in the sampling frame. Standard errors were calculated taking  
17 into account the complex design and weights.<sup>39</sup> More detail on the calculation of weights is  
18 provided elsewhere.<sup>40</sup>  
19  
20  
21  
22

23 In our reliability analysis, we modelled repeated measurements on child carotid IMT films  
24 with random effects for rater and child to estimate between-child variance, between-rater  
25 variance, and residual error variance. These variance components were used to calculate  
26 within-rater and between-raters intraclass correlations (the ratio of explained variability to the  
27 total model variability), and within- and between-rater coefficients of variation (the standard  
28 deviation of measurement error divided by the mean).  
29  
30  
31  
32  
33

## 34 35 **RESULTS**

36 **Sample characteristics:** The recruitment and retention of participants in the Child Health  
37 CheckPoint are described in detail elsewhere.<sup>30</sup> Of the 1874 families who participated in  
38 CheckPoint assessment centres, we obtained carotid ultrasound images of analysable quality  
39 from 1489 children and 1476 parents (figure 1). The majority of excluded families undertook  
40 home visits, where carotid IMT could not be performed (n=378, 20.2%). Few data were lost  
41 due to poor quality images or inability to measure at the assessment centre (figure 1).  
42  
43  
44  
45

46 The sample characteristics of parents and children are outlined in table 1, stratified by sex.  
47  
48  
49  
50  
51  
52  
53  
54  
55  
56  
57  
58  
59  
60

**Table 1. Sample characteristics, stratified by sex, of children and parents.**

| <b>Child Characteristics</b>  | <b>All</b> |              |            | <b>Boys</b>    |              |            | <b>Girls</b>   |              |            |
|-------------------------------|------------|--------------|------------|----------------|--------------|------------|----------------|--------------|------------|
|                               | <b>N</b>   | <b>mean*</b> | <b>SD*</b> | <b>N</b>       | <b>mean*</b> | <b>SD*</b> | <b>N</b>       | <b>mean*</b> | <b>SD*</b> |
| Age, years                    | 1489       | 12.0         | 0.4        | 745            | 12.0         | 0.4        | 744            | 12.0         | 0.4        |
| Height, cm                    | 1488       | 153.2        | 7.9        | 744            | 152.5        | 8.0        | 744            | 153.9        | 7.8        |
| BMI, kg/m <sup>2</sup>        | 1488       | 19.4         | 3.6        | 744            | 19.3         | 3.5        | 744            | 19.6         | 3.6        |
| BMI z-score (CDC)             | 1488       | 0.37         | 1.02       | 744            | 0.37         | 1.02       | 744            | 0.37         | 1.01       |
| Waist, cm                     | 1488       | 66.6         | 8.7        | 744            | 67.3         | 8.8        | 744            | 65.8         | 8.5        |
| SBP, mmHg                     | 1371       | 108.6        | 8.0        | 673            | 108.4        | 7.8        | 698            | 108.9        | 8.2        |
| DBP, mmHg                     | 1371       | 63.1         | 5.6        | 673            | 62.7         | 5.7        | 698            | 63.5         | 5.4        |
| Disadvantage Index            | 1485       | 1010         | 63         | 742            | 1008         | 63         | 743            | 1011         | 63         |
| Lumen diameter, mm            | 1419       | 4.86         | 0.43       | 708            | 5.0          | 0.4        | 711            | 4.7          | 0.4        |
|                               | <b>N</b>   | <b>n</b>     | <b>%*</b>  | <b>N</b>       | <b>n</b>     | <b>%*</b>  | <b>N</b>       | <b>n</b>     | <b>%*</b>  |
| Diabetes                      | 1489       | 3            | 0.2        | 745            | 1            | 0.1        | 744            | 2            | 0.3        |
| Started puberty               | 1374       | 1234         | 90.7       | 700            | 591          | 84.4       | 674            | 643          | 95.4       |
| Pacemaker                     | 1489       | 0            | 0.0        | 745            | -            | -          | 744            | -            | -          |
| <b>Parent Characteristics</b> | <b>All</b> |              |            | <b>Fathers</b> |              |            | <b>Mothers</b> |              |            |
|                               | <b>N</b>   | <b>mean*</b> | <b>SD*</b> | <b>N</b>       | <b>mean*</b> | <b>SD*</b> | <b>N</b>       | <b>mean*</b> | <b>SD*</b> |
| Age, years                    | 1476       | 43.7         | 5.5        | 195            | 46.2         | 7.0        | 1281           | 43.3         | 5.2        |
| Height, cm                    | 1474       | 166.1        | 7.8        | 195            | 177.8        | 7.6        | 1279           | 164.4        | 6.2        |
| BMI, kg/m <sup>2</sup>        | 1472       | 28.2         | 6.2        | 195            | 29.0         | 5.0        | 1277           | 28.07        | 6.4        |
| Waist, cm                     | 1468       | 87.4         | 14.4       | 194            | 98.1         | 13.3       | 1274           | 85.8         | 13.8       |
| SBP, mmHg                     | 1345       | 120.4        | 12.8       | 177            | 128.3        | 11.7       | 1168           | 119.2        | 12.6       |
| DBP, mmHg                     | 1345       | 73.86        | 8.7        | 177            | 78.2         | 8.5        | 1168           | 73.2         | 8.5        |
| Disadvantage Index            | 1472       | 1010         | 63         | 193            | 1004         | 72         | 1279           | 1011         | 62         |
| Lumen diameter, mm            | 1336       | 5.26         | 0.50       | 160            | 5.9          | 0.5        | 1176           | 5.2          | 0.4        |
|                               | <b>N</b>   | <b>n</b>     | <b>%*</b>  | <b>N</b>       | <b>n</b>     | <b>%*</b>  | <b>N</b>       | <b>n</b>     | <b>%*</b>  |
| Diabetes                      | 1476       | 31           | 2.6        | 195            | 9            | 7          | 1281           | 22           | 1.9        |
| Heart condition               | 1476       | 32           | 3.2        | 195            | 8            | 5.1        | 1281           | 24           | 2.9        |
| Pre-existing hypertension     | 1476       | 77           | 6.2        | 195            | 21           | 12.5       | 1281           | 56           | 5.3        |
| Pacemaker                     | 1476       | 2            | 0.1        | 195            | 0            | 0          | 1281           | 2            | 0.09       |

1  
2  
3  
4 \*weighted mean, standard deviation and percentage.

5 SD: standard deviation; CDC: Centers for Disease Control and Prevention; BMI: body mass index; SBP: systolic blood pressure; DBP: diastolic blood pressure; Disadvantage  
6 Index: the Index of Relative Socioeconomic Disadvantage; n: number of affected participants; N: number of participants in cohort with this measure (denominator).  
7  
8  
9  
10  
11  
12  
13  
14  
15  
16  
17  
18  
19  
20  
21  
22  
23  
24  
25  
26  
27  
28  
29  
30  
31  
32  
33  
34  
35  
36  
37  
38  
39  
40  
41  
42  
43  
44  
45  
46  
47

For peer review only

1  
2  
3 The parent sample was predominantly mothers (n=1281, 86.8%) from a relatively  
4 socioeconomically advantaged background (mean Disadvantage Index score one tenth of a  
5 standard deviation above the national average). Approximately one in 10 parents reported a  
6 cardiovascular related health condition (diabetes, hypertension, heart condition, pace maker)  
7 (table 1).  
8  
9  
10

11 In children, there were similar proportions of each sex. Age- and sex-specific BMI z-scores  
12 were 0.37 standard deviations above population reference values (table 1).  
13  
14

15 **Carotid intima-media thickness:** Summary statistics for child and parent carotid IMT are  
16 presented in table 2. Extended percentile values are found in supplementary table 1.  
17  
18  
19  
20  
21  
22  
23  
24  
25  
26  
27  
28  
29  
30  
31  
32  
33  
34  
35  
36  
37  
38  
39  
40  
41  
42  
43  
44  
45  
46  
47  
48  
49  
50  
51  
52  
53  
54  
55  
56  
57  
58  
59  
60

**Table 2. Distribution of carotid intima-media thickness, distensibility and elasticity in children and parents.**

| Child characteristics             | All  |        |         |             | Boys    |        |         |             | Girls   |        |         |             |
|-----------------------------------|------|--------|---------|-------------|---------|--------|---------|-------------|---------|--------|---------|-------------|
|                                   | N    | Mean   | SD      | 95% CI      | N       | Mean   | SD      | 95% CI      | N       | Mean   | SD      | 95% CI      |
| Far wall mean IMT, mm             | 1485 | 0.50   | 0.06    | 0.49 - 0.50 | 743     | 0.50   | 0.06    | 0.50 - 0.51 | 742     | 0.49   | 0.06    | 0.49 - 0.50 |
| Far wall maximum IMT, mm          | 1485 | 0.58   | 0.05    | 0.58 - 0.59 | 743     | 0.59   | 0.05    | 0.58 - 0.59 | 742     | 0.58   | 0.05    | 0.57 - 0.58 |
| Carotid artery distensibility, %  | 1419 | 17.4   | 3.2     | 17.2 - 17.6 | 708     | 17.1   | 3.0     | 16.8 - 17.3 | 711     | 17.7   | 3.3     | 17.4 - 18.0 |
| Carotid artery elasticity, %/mmHg | 1312 | 0.48   | 0.09    | 0.47 - 0.48 | 641     | 0.47   | 0.08    | 0.46 - 0.48 | 671     | 0.49   | 0.09    | 0.48 - 0.50 |
|                                   | N    | Median | IQR 25% | IQR 75%     | N       | Median | IQR 25% | IQR 75%     | N       | Median | IQR 25% | IQR 75%     |
| Far wall mean IMT, mm             | 1485 | 0.52   | 0.46    | 0.54        | 743     | 0.52   | 0.47    | 0.55        | 742     | 0.51   | 0.45    | 0.54        |
| Far wall maximum IMT, mm          | 1485 | 0.58   | 0.56    | 0.61        | 743     | 0.59   | 0.56    | 0.61        | 742     | 0.58   | 0.56    | 0.60        |
| Carotid artery distensibility, %  | 1419 | 17.13  | 15.3    | 19.17       | 708     | 16.9   | 15.1    | 18.9        | 711     | 17.4   | 15.5    | 19.4        |
| Carotid artery elasticity, %/mmHg | 1312 | 0.47   | 0.42    | 0.53        | 641     | 0.47   | 0.42    | 0.52        | 671     | 0.48   | 0.43    | 0.54        |
| Parent characteristics            | All  |        |         |             | Fathers |        |         |             | Mothers |        |         |             |
|                                   | N    | mean   | SD      | 95% CI      | N       | Mean   | SD      | 95% CI      | N       | Mean   | SD      | 95% CI      |
| Far wall mean IMT, mm             | 1468 | 0.57   | 0.07    | 0.56 - 0.57 | 195     | 0.61   | 0.11    | 0.59 - 0.63 | 1273    | 0.56   | 0.07    | 0.56 - 0.57 |
| Far wall maximum IMT, mm          | 1468 | 0.66   | 0.1     | 0.66 - 0.67 | 195     | 0.73   | 0.14    | 0.71 - 0.76 | 1273    | 0.65   | 0.08    | 0.65 - 0.66 |
| Carotid artery distensibility, %  | 1336 | 8.92   | 2.14    | 8.77 - 9.08 | 160     | 8.3    | 2.2     | 7.9 - 8.7   | 1176    | 9.0    | 2.1     | 8.9 - 9.2   |
| Carotid artery elasticity, %/mmHg | 1229 | 0.25   | 0.06    | 0.24 - 0.25 | 145     | 0.21   | 0.06    | 0.20 - 0.23 | 1084    | 0.25   | 0.06    | 0.25 - 0.26 |
|                                   | N    | median | IQR 25% | IQR 75%     | N       | Median | IQR 25% | IQR 75%     | N       | Median | IQR 25% | IQR 75%     |
| Far wall mean IMT, mm             | 1468 | 0.56   | 0.53    | 0.59        | 195     | 0.59   | 0.54    | 0.68        | 1273    | 0.55   | 0.53    | 0.58        |
| Far wall maximum IMT, mm          | 1468 | 0.64   | 0.6     | 0.71        | 195     | 0.72   | 0.62    | 0.83        | 1273    | 0.63   | 0.59    | 0.69        |
| Carotid artery distensibility, %  | 1336 | 8.73   | 7.47    | 10.31       | 160     | 8.2    | 6.9     | 9.7         | 1176    | 8.8    | 7.6     | 10.4        |
| Carotid artery elasticity, %/mmHg | 1229 | 0.24   | 0.21    | 0.28        | 145     | 0.21   | 0.18    | 0.24        | 1084    | 0.25   | 0.21    | 0.29        |

IMT: intima-media thickness; N: number of participants in cohort with this measure, SD: standard deviation; IQR: interquartile range.



1  
2  
3 Mean and maximum carotid IMT in children approximated a normal distribution (figure 2).  
4 Boys had marginally greater average mean and maximum carotid IMT than girls (0.50 vs  
5 0.49 mm for mean IMT). Mean carotid IMT values in children ranged from 0.31 to 0.65 mm,  
6 and maximum IMT values from 0.36 to 0.76 mm.  
7  
8

9  
10 In parents, mean and maximum carotid IMT also approximated a normal distribution but with  
11 a larger positive skew. Men had substantially larger mean and maximum carotid IMT than  
12 women (0.61 vs 0.56 mm for mean IMT). Mean carotid IMT ranged from 0.35 to 0.98 mm,  
13 and maximum IMT ranged from 0.42 to 1.18 mm. Average parental carotid IMT was larger  
14 than child IMT (0.57 vs 0.50 mm for mean IMT).  
15  
16  
17

18 **Other carotid artery functional measures:** Summary statistics for child and parent carotid  
19 artery distensibility and elasticity are shown in table 3. Extended percentile values are found  
20 in supplementary table 1. Values for both distensibility and elasticity both in children and  
21 parents approximated a normal distribution (figure 2). Boys had marginally less elastic  
22 arteries than girls, and men had substantially less elastic arteries than women (table 2).  
23 Distensibility values for children ranged from 5.8 to 32.2%, and elasticity values from 0.16 to  
24 0.81%/mmHg; for parents, distensibility values ranged from 3.1 to 19.1%, and elasticity  
25 values from 0.07 to 0.61%/mmHg.  
26  
27  
28  
29  
30  
31

32 **Parent-child concordance:** Small, positive correlations were seen in parent-child and  
33 mother-child analyses for all measures. For example, mother-child correlations were 0.12 and  
34 0.10 for far wall mean and maximum IMT respectively, and 0.19 and 0.11 for carotid artery  
35 distensibility and elasticity. None of the associations attenuated in adjusted linear regression  
36 models, suggesting that parent-child concordance was independent of age, sex, height of the  
37 child and age of the parent. The small father sample size (n=195, 13.2%) made sex  
38 comparisons difficult (table 3).  
39  
40  
41  
42  
43  
44  
45  
46  
47  
48  
49  
50  
51  
52  
53  
54  
55  
56  
57  
58  
59  
60

**Table 3. Parent-child concordance in weighted analyses.**

| Pearson's Correlation             | Mothers |      |              | Fathers |       |               | All parents |      |              |
|-----------------------------------|---------|------|--------------|---------|-------|---------------|-------------|------|--------------|
|                                   | N       | CC   | 95% CI       | N       | CC    | 95% CI        | N           | CC   | 95% CI       |
| Far wall mean IMT                 | 1245    | 0.12 | 0.05 to 0.23 | 192     | 0.01  | -0.13 to 0.14 | 1437        | 0.09 | 0.02 to 0.16 |
| Far wall maximum IMT              | 1245    | 0.10 | 0.03 to 0.21 | 192     | 0.05  | -0.09 to 0.18 | 1437        | 0.08 | 0.01 to 0.15 |
| Carotid artery distensibility     | 1105    | 0.19 | 0.10 to 0.25 | 150     | 0.17  | -0.05 to 0.37 | 1255        | 0.18 | 0.10 to 0.23 |
| Carotid artery elasticity         | 1003    | 0.10 | 0.02 to 0.18 | 130     | 0.28  | 0.01 to 0.63  | 1133        | 0.11 | 0.03 to 0.19 |
| Adjusted Linear Regression        | N       | ERC  | P value      | N       | ERC   | P value       | N           | ERC  | P value      |
| Far wall mean IMT, mm             | 1183    | 0.11 | 0.004        | 182     | -0.01 | 0.88          | 1365        | 0.08 | 0.02         |
| Far wall maximum IMT, mm          | 1183    | 0.05 | 0.04         | 182     | 0.01  | 0.80          | 1365        | 0.04 | 0.05         |
| Carotid artery distensibility, %  | 1101    | 0.29 | <0.001       | 148     | 0.08  | 0.48          | 1249        | 0.27 | <0.001       |
| Carotid artery elasticity, %/mmHg | 999     | 0.15 | 0.004        | 128     | 0.25  | 0.13          | 1127        | 0.16 | 0.002        |

\*Non-biological caregivers were excluded from these analyses (n=13).

Covariates in adjusted linear regression models include parent and child age, parent and child height, child lumen diameter (for carotid IMT only), Disadvantage Index and child sex.

Disadvantage Index: the Index of Relative Socioeconomic Disadvantage; IMT: intima-media thickness; N: number of participants in cohort with this measure, CC: correlation coefficient; ERC: estimated regression coefficient; CI: confidence interval.

1  
2  
3 **Reliability:** The within-observer coefficients of variation were 6.5% (95% CI 6.0 to 6.9%)  
4 and 4.9% (95% CI 4.6 to 5.2%) for mean and maximum carotid IMT values respectively, and  
5 the between-observer coefficients of variation were 9.5% (95% CI 7.5 to 11.5%) and 6.2%  
6 (95% CI 5.2 to 7.2%) respectively. Within-observer intraclass correlations were 0.71 (95% CI  
7 0.63 to 0.78) and 0.62 (95% CI 0.54 to 0.71) respectively. Between-observer intraclass  
8 correlations were 0.64 (95% CI 0.54 to 0.74) and 0.59 (95% CI 0.49 to 0.68).  
9  
10  
11  
12  
13

## 14 **DISCUSSION**

15 **Principal findings:** We provide normative carotid IMT, distensibility and elasticity values  
16 for Australian 11-12-year-old children and their parents, together with parent-child  
17 concordance. Our results highlight that carotid IMT, distensibility and elasticity are  
18 approximately normally distributed in children, but that by middle age distributions become  
19 more skewed, potentially representing developing pathology. Mother-child concordances  
20 were modest but consistent, ranging from 0.10 to 0.19 for carotid IMT, distensibility and  
21 elasticity.  
22  
23  
24  
25  
26

27 **Strengths and weaknesses:** This is the largest study to date to provide carotid IMT  
28 concordance data between children and their parents in a large population-based sample.  
29 Shared protocols between children and parents strengthens our conclusions about parent-child  
30 concordance. This is also the first major cohort study to identify the distribution of carotid  
31 IMT and other vascular measures in pre-adolescent children and mid-life parents specifically  
32 in Australia. The population-based sampling of this cohort suggest that the conclusions  
33 should generalise to the wider Australian child population. Similarities between the carotid  
34 IMT distributions in this study and those from international studies suggest our values may  
35 also be generalisable to other populations.<sup>22 41 42</sup> Finally, raters were blinded to participants'  
36 baseline characteristics, including age, weight, height, BMI and Disadvantage Score.  
37  
38  
39  
40  
41  
42  
43

44 Potential limitations to the study include the relative mean social advantage of the  
45 participants, in keeping with attrition patterns common to many longitudinal studies. Survey  
46 weights minimise this bias, and the similarity between analyses with and without survey  
47 weights (data not shown) are reassuring. Secondly, relatively few fathers attended  
48 CheckPoint, which could lead to biased estimates, as the incidence of CVD and associated  
49 risk factors show strong sex differences.<sup>43</sup> However, the reported differences between  
50 mother-child and father-child concordance in our study are minimal and have some overlap  
51 in confidence intervals; this suggests some degree of consistency between father and mother  
52  
53  
54  
55  
56  
57  
58  
59  
60

1  
2  
3 concordance. Thirdly, our cross-sectional data were not linked with longitudinal CVD  
4 outcomes; the relevance of carotid artery parameters in childhood are still unknown. Finally,  
5 the reliability of our carotid IMT analysis was modest, though comparable to other published  
6 results.<sup>22</sup> The inherent underlying error in measurement may have led to underestimating true  
7 associations.<sup>44</sup>  
8  
9

10  
11 **Meaning and implications for clinicians and policy makers:** Our findings are consistent  
12 with the wider literature. In particular, our results almost exactly approximate those reported  
13 by Ryder et al of parent-child correlations in a US population ( $r=0.08$  for carotid IMT).<sup>29</sup>  
14 Ryder's sibling-sibling correlations were marginally higher within the same cohort ( $r=0.11$ ),  
15 and were higher again, according to another study, in late middle age ( $r=0.36$ ).<sup>28</sup> This higher  
16 concordance between mid-life siblings may reflect smaller relative measurement error,  
17 because a fixed absolute measurement error becomes a smaller relative proportion of a  
18 measurement as IMT increases with age. Alternatively, it could reflect a cumulative effect of  
19 unspecified age-dependent exposures on carotid parameters. The accumulation of atheroma  
20 may have begun in childhood but may be a slow, lengthy process that becomes more apparent  
21 with increasing age. Age differences could also be a significant discriminating factor that  
22 obscures true parent-child concordance if this varies across the life cycle, especially for  
23 measures that are strongly correlated with age such as IMT. Improved estimates might be  
24 achieved if parents and children were measured at the same chronological age; however, this  
25 offers little help in understanding determinants of IMT in children now.  
26  
27  
28  
29  
30  
31  
32  
33  
34  
35

36 The lack of evidence of father-child concordance for any parameter may reflect (1) a true sex  
37 difference in parent-child concordance, (2) chance and/or lack of power (with only 195  
38 fathers in this sample), and/or (3) those fathers who attended CheckPoint not being  
39 representative of fathers of 11-12 year olds in general. Given the direction and magnitude of  
40 the point estimates we think (2) is most likely, but this can only be verified in further studies  
41 with larger numbers of fathers. Despite their similar number of fathers ( $n=186$ ), Ryder et al's  
42 findings<sup>29</sup> did contrast with ours in reporting a higher heritability statistic ( $h^2=41.5\%$ ) in  
43 father-offspring dyads than mother-offspring dyads ( $h^2=23.4\%$ ) in distensibility measures,  
44 which would also imply a higher correlation coefficient.  
45  
46  
47  
48  
49  
50

51 The relatively higher concordance in carotid artery distensibility ( $r=0.19$ ) compared to other  
52 measures suggests differences between structural and functional vascular measures.<sup>23 25</sup>  
53 Functional vascular measures such as carotid artery distensibility and elasticity are plausibly  
54 more proximal on the causal pathway than structural vascular measures such as IMT. If  
55  
56  
57  
58  
59  
60

1  
2  
3 functional vascular changes occurred before structural changes, or if they were more sensitive  
4 to environmental exposures, concordance may be evident at an earlier age. Additionally and  
5 as above, carotid IMT may be more sensitive to measurement errors than functional  
6 measures, potentially attenuating underlying associations.  
7  
8

9  
10 **Unanswered questions and future research:** These data provide a reference for future  
11 studies of LSAC participants, which would ideally map the natural history of carotid IMT  
12 from childhood onwards. The predictive value of childhood carotid IMT for future carotid  
13 IMT and future CVD is uncertain - an important scientific and clinical knowledge gap,<sup>5</sup> given  
14 that this could inform prevention. It is possible that whilst the carotid IMT scores of middle-  
15 aged parents do not strongly predict the carotid IMT scores of their pre-adolescent children,  
16 parental values may predict the carotid IMT score of their children when they themselves  
17 reach middle-age. Research effort could also be directed to finding simpler and more accurate  
18 markers of early atherosclerosis that are less prone to measurement error.  
19  
20  
21  
22  
23

24  
25 In conclusion, we provide normative data of carotid IMT and related vascular measures for  
26 Australian 11-12-year-old children and their parents. Though modest, our demonstrated  
27 concordance - despite known measurement error and the large age difference - suggests a  
28 meaningful degree of heritability in carotid structure and function; the relative contributions  
29 of genetic and environmental underpinnings at different life stages remain to be parsed.  
30  
31  
32  
33  
34  
35  
36  
37  
38  
39  
40  
41  
42  
43  
44  
45  
46  
47  
48  
49  
50  
51  
52  
53  
54  
55  
56  
57  
58  
59  
60

1  
2  
3 **ACKNOWLEDGEMENTS:** The Murdoch Children's Research Institute (MCRI)  
4 administered the research grant for the study and provided infrastructural support to its staff  
5 but played no role in the conduct or analysis of the trial. Research at the MCRI is supported  
6 by the Victorian Government's Operational Infrastructure Support Program.  
7

8  
9 The funding bodies had no role in relation to the design and conduct of the study; collection,  
10 management, analysis, and interpretation of the data; preparation, review, or approval of the  
11 manuscript; and decision to submit the manuscript for publication.  
12

13  
14 This paper uses unit record data from Growing Up in Australia, the Longitudinal Study of  
15 Australian Children. The study is conducted in partnership between the Department of Social  
16 Services (DSS), the Australian Institute of Family Studies (AIFS) and the Australian Bureau  
17 of Statistics (ABS). The findings and views reported in this paper are those of the author and  
18 should not be attributed to DSS, AIFS or the ABS.  
19

20  
21 REDCap (Research Electronic Data Capture) electronic data capture tools were used in this  
22 study. More information about this software can be found at: [www.project-redcap.org](http://www.project-redcap.org). We  
23 thank the LSAC and CheckPoint study participants, staff and students for their contributions.  
24  
25  
26  
27

28  
29 **COMPETING INTERESTS:** All authors have completed the ICMJE uniform disclosure  
30 form at [www.icmje.org/coi\\_disclosure.pdf](http://www.icmje.org/coi_disclosure.pdf) and declare financial support for the submitted  
31 work from the National Health and Medical Research Council of Australia, The Royal  
32 Children's Hospital Foundation, the Murdoch Children's Research Institute, The University  
33 of Melbourne, the National Heart Foundation of Australia, Financial Markets Foundation for  
34 Children and the Victoria Deaf Education Institute. Personal fees were received by MW from  
35 the Australian Department of Social Services; RSL, MW and DPB from the NHMRC; RSL  
36 from the Australian Government Research Training Program, MJ from a Federal Research  
37 Grant of Finland, the Finnish Cardiovascular Foundation, the Juho Vainio Foundation, Sigrid  
38 Juselius Foundation, Maud Kuistila Foundation, the Paulo Foundation, and the Murdoch  
39 Children's Research Institute; DPB from the National Heart Foundation of Australia; and  
40 MW from Cure Kids, New Zealand for the submitted work. MW received grants from NZ  
41 Ministry of Business, Innovation & Employment and A Better Start/Cure Kids NZ, and  
42 support from Sandoz to present at a symposium outside the submitted work.  
43  
44  
45  
46  
47  
48  
49  
50  
51  
52

53 **FUNDING:** This work was supported by the National Health and Medical Research Council  
54 (NHMRC) of Australia (1041352, 1109355), The Royal Children's Hospital Foundation  
55 (2014-241), Murdoch Children's Research Institute (MCRI), The University of Melbourne,  
56  
57  
58  
59

1  
2  
3 National Heart Foundation of Australia (100660), Financial Markets Foundation for Children  
4 (2014-055) and the Victorian Deaf Education Institute. Research at the MCRI is supported by  
5 the Victorian Government's Operational Infrastructure Support Program.

6  
7 The following authors were supported by the NHMRC: Postgraduate Scholarship (1114567)  
8 to RSL, Senior Research Fellowships to MW (1046518) and DPB (1064629). RSL is  
9 supported by an Australian Government Research Training Program Scholarship. MJ is  
10 supported by the Federal Research Grant of Finland to Turku University Hospital, Finnish  
11 Cardiovascular Foundation, Juho Vainio Foundation, Sigrid Juselius Foundation, Maud  
12 Kuistila Foundation, the Paulo Foundation, and the Murdoch Children's Research Institute  
13 (Dame Elizabeth Murdoch Fellowship). MW was supported by Cure Kids, New Zealand.  
14 DPB was supported by the National Heart Foundation of Australia: Honorary Future Leader  
15 Fellowship (100369).

16  
17 The MCRI administered the research grants for the study and provided infrastructural support  
18 (IT and biospecimen management) to its staff and the study, but played no role in the conduct  
19 or analysis of the trial. DSS played a role in study design; however, no other funding bodies  
20 had a role in the study design and conduct; data collection, management, analysis, and  
21 interpretation; preparation, review, or approval of the manuscript; and decision to submit the  
22 manuscript for publication.

23  
24  
25  
26  
27  
28  
29  
30  
31  
32  
33 **CONTRIBUTIONS:** Richard S Liu, Sophie Dunn, David P Burgner contributed to study  
34 conception and interpretation of results, drafted the initial manuscript, critically revised  
35 further drafts and approved the final manuscript as submitted.

36  
37 Anneke Grobler, Katherine Lange contributed interpretation of results, performed the  
38 statistical analysis, drafted the initial manuscript, critically revised further drafts and  
39 approved the final manuscript as submitted.

40  
41  
42  
43 Denise Becker contributed to conception and interpretation of results of the reliability  
44 analysis, performed the statistical analysis, critically revised further drafts and approved the  
45 final manuscript as submitted.

46  
47  
48 Greta Goldsmith contributed to study conception, data collection and interpretation of results,  
49 critically revised further drafts and approved the final manuscript as submitted.

50  
51 John Carlin, Markus Juonala, Melissa Wake contributed to study conception and  
52 interpretation of results, critically revised further drafts and approved the final manuscript as  
53 submitted.



1  
2  
3 **DATA SHARING STATEMENT:** Dataset and technical documents are available from  
4 *Growing Up in Australia: The Longitudinal Study of Australian Children* via low-cost license  
5 for bone fide researchers. More information is available at [www.growingupinaustralia.gov.au](http://www.growingupinaustralia.gov.au)  
6  
7

8  
9 **FIGURE CAPTIONS AND FOOTNOTES:**

10 **Figure 1.** Participant flow chart. n: number of families; c: number of children; p: number of  
11 attending adults; MAC: main assessment centre; mAC: mini assessment centre; HV: home  
12 visit assessment; LSAC: Longitudinal Study of Australian Children.  
13

14 **Figure 2.** Density plots for each primary and secondary carotid artery outcome. Males (blue),  
15 females (red), and both sexes (thin dotted black line) plotted on the same graph for each  
16 outcome. X and Y scales common between child and parent, and between mean and  
17 maximum IMT variables.  
18  
19

20 **SUPPLEMENTARY DOCUMENT DESCRIPTIONS:**

21 **Supplementary Table 1.** Percentile values for primary and secondary outcomes.  
22  
23  
24  
25  
26  
27  
28  
29  
30  
31  
32  
33  
34  
35  
36  
37  
38  
39  
40  
41  
42  
43  
44  
45  
46  
47  
48  
49  
50  
51  
52  
53  
54  
55  
56  
57  
58  
59  
60



## REFERENCES

1. Beaglehole R, Magnus P. The search for new risk factors for coronary heart disease: occupational therapy for epidemiologists? *Int J Epidemiol* 2002;**31**(6):1117-22; author reply 34-5.
2. Naghavi M, Wang HD, Lozano R, et al. Global, regional, and national age-sex specific all-cause and cause-specific mortality for 240 causes of death, 1990-2013: a systematic analysis for the Global Burden of Disease Study 2013. *Lancet* 2015;**385**(9963):117-71. doi:10.1016/S0140-6736(14)61682-2.
3. Baldassarre D, Amato M, Pustina L, et al. Measurement of carotid artery intima-media thickness in dyslipidemic patients increases the power of traditional risk factors to predict cardiovascular events. *Atherosclerosis* 2007;**191**(2):403-8. doi:10.1016/j.atherosclerosis.2006.04.008.
4. Vernon ST, Coffey S, Bhindi R, et al. Increasing proportion of ST elevation myocardial infarction patients with coronary atherosclerosis poorly explained by standard modifiable risk factors. *Eur J Prev Cardiol* 2017:2047487317720287. doi:10.1177/2047487317720287.
5. Urbina EM, Williams RV, Alpert BS, et al. Noninvasive assessment of subclinical atherosclerosis in children and adolescents: recommendations for standard assessment for clinical research: a scientific statement from the American Heart Association. *Hypertension* 2009;**54**(5):919-50. doi:10.1161/HYPERTENSIONAHA.109.192639.
6. Chambless LE, Folsom AR, Clegg LX, et al. Carotid wall thickness is predictive of incident clinical stroke: the Atherosclerosis Risk in Communities (ARIC) study. *Am J Epidemiol* 2000;**151**(5):478-87.
7. Lorenz MW, von Kegler S, Steinmetz H, et al. Carotid intima-media thickening indicates a higher vascular risk across a wide age range: prospective data from the Carotid Atherosclerosis Progression Study (CAPS). *Stroke* 2006;**37**(1):87-92. doi:10.1161/01.STR.0000196964.24024.ea.
8. O'Leary DH, Polak JF, Kronmal RA, et al. Carotid-artery intima and media thickness as a risk factor for myocardial infarction and stroke in older adults. *Cardiovascular Health Study Collaborative Research Group. N Engl J Med* 1999;**340**(1):14-22. doi:10.1056/NEJM199901073400103.
9. Salonen JT, Salonen R. Ultrasound B-mode imaging in observational studies of atherosclerotic progression. *Circulation* 1993;**87**(3 Suppl):II56-65.
10. van der Meer IM, Bots ML, Hofman A, et al. Predictive value of noninvasive measures of atherosclerosis for incident myocardial infarction: the Rotterdam Study. *Circulation* 2004;**109**(9):1089-94. doi:10.1161/01.CIR.0000120708.59903.1B.
11. Rosvall M, Janzon L, Berglund G, et al. Incident coronary events and case fatality in relation to common carotid intima-media thickness. *J Intern Med* 2005;**257**(5):430-7. doi:10.1111/j.1365-2796.2005.01485.x.
12. Pignoli P, Tremoli E, Poli A, et al. Intimal plus medial thickness of the arterial wall: a direct measurement with ultrasound imaging. *Circulation* 1986;**74**(6):1399-406.
13. Persson J, Formgren J, Israelsson B, et al. Ultrasound-determined intima-media thickness and atherosclerosis. Direct and indirect validation. *Arterioscler Thromb* 1994;**14**(2):261-4.
14. Kablak-Ziembicka A, Tracz W, Przewlocki T, et al. Association of increased carotid intima-media thickness with the extent of coronary artery disease. *Heart* 2004;**90**(11):1286-90. doi:10.1136/hrt.2003.025080.
15. Lamotte C, Iliescu C, Libersa C, et al. Increased intima-media thickness of the carotid artery in childhood: a systematic review of observational studies. *Eur J Pediatr* 2011;**170**(6):719-29. doi:10.1007/s00431-010-1328-y.

16. Hodis HN, Mack WJ, LaBree L, et al. The role of carotid arterial intima-media thickness in predicting clinical coronary events. *Ann Intern Med* 1998;**128**(4):262-9.
17. van den Oord SC, Sijbrands EJ, ten Kate GL, et al. Carotid intima-media thickness for cardiovascular risk assessment: systematic review and meta-analysis. *Atherosclerosis* 2013;**228**(1):1-11. doi:10.1016/j.atherosclerosis.2013.01.025.
18. Stein JH, Korcarz CE, Hurst RT, et al. Use of carotid ultrasound to identify subclinical vascular disease and evaluate cardiovascular disease risk: a consensus statement from the American Society of Echocardiography Carotid Intima-Media Thickness Task Force. Endorsed by the Society for Vascular Medicine. *J Am Soc Echocardiogr* 2008;**21**(2):93-111; quiz 89-90. doi:10.1016/j.echo.2007.11.011.
19. Bots ML, Sutton-Tyrrell K. Lessons from the past and promises for the future for carotid intima-media thickness. *J Am Coll Cardiol* 2012;**60**(17):1599-604. doi:10.1016/j.jacc.2011.12.061.
20. Liao D, Arnett DK, Tyroler HA, et al. Arterial stiffness and the development of hypertension. The ARIC study. *Hypertension* 1999;**34**(2):201-6.
21. Tentolouris N, Liatis S, Moysakis I, et al. Aortic distensibility is reduced in subjects with type 2 diabetes and cardiac autonomic neuropathy. *Eur J Clin Invest* 2003;**33**(12):1075-83.
22. Doyon A, Kracht D, Bayazit AK, et al. Carotid artery intima-media thickness and distensibility in children and adolescents: reference values and role of body dimensions. *Hypertension* 2013;**62**(3):550-6. doi:10.1161/HYPERTENSIONAHA.113.01297.
23. Wiegman A, Hutten BA, de Groot E, et al. Efficacy and safety of statin therapy in children with familial hypercholesterolemia: a randomized controlled trial. *JAMA* 2004;**292**(3):331-7. doi:10.1001/jama.292.3.331.
24. Woo KS, Chook P, Yu CW, et al. Effects of diet and exercise on obesity-related vascular dysfunction in children. *Circulation* 2004;**109**(16):1981-6. doi:10.1161/01.CIR.0000126599.47470.BE.
25. Braamskamp M, Langslet G, McCrindle BW, et al. Effect of Rosuvastatin on Carotid Intima-Media Thickness in Children With Heterozygous Familial Hypercholesterolemia: The CHARON Study (Hypercholesterolemia in Children and Adolescents Taking Rosuvastatin Open Label). *Circulation* 2017;**136**(4):359-66. doi:10.1161/CIRCULATIONAHA.116.025158.
26. Zhao J, Cheema FA, Bremner JD, et al. Heritability of carotid intima-media thickness: a twin study. *Atherosclerosis* 2008;**197**(2):814-20. doi:10.1016/j.atherosclerosis.2007.07.030.
27. Sacco RL, Blanton SH, Slifer S, et al. Heritability and linkage analysis for carotid intima-media thickness: the family study of stroke risk and carotid atherosclerosis. *Stroke* 2009;**40**(7):2307-12. doi:10.1161/STROKEAHA.109.554121.
28. Fox CS, Polak JF, Chazaro I, et al. Genetic and environmental contributions to atherosclerosis phenotypes in men and women: heritability of carotid intima-media thickness in the Framingham Heart Study. *Stroke* 2003;**34**(2):397-401.
29. Ryder JR, Pankratz ND, Dengel DR, et al. Heritability of Vascular Structure and Function: A Parent-Child Study. *J Am Heart Assoc* 2017;**6**(2). doi:10.1161/JAHA.116.004757.
30. Clifford S, Davies S, Wake M. Growing Up in Australia's Child Health CheckPoint cohort summary and methodology. **Submitted to BMJ Open October 2017.**
31. Wake M, Clifford S, York E, et al. Introducing growing up in Australia's child health check point: A physical health and biomarkers module for the longitudinal study of Australian children. *Family Matters* 2014(95):15.

- 1
  - 2
  - 3
  - 4
  - 5
  - 6
  - 7
  - 8
  - 9
  - 10
  - 11
  - 12
  - 13
  - 14
  - 15
  - 16
  - 17
  - 18
  - 19
  - 20
  - 21
  - 22
  - 23
  - 24
  - 25
  - 26
  - 27
  - 28
  - 29
  - 30
  - 31
  - 32
  - 33
  - 34
  - 35
  - 36
  - 37
  - 38
  - 39
  - 40
  - 41
  - 42
  - 43
  - 44
  - 45
  - 46
  - 47
  - 48
  - 49
  - 50
  - 51
  - 52
  - 53
  - 54
  - 55
  - 56
  - 57
  - 58
  - 59
  - 60
32. Touboul PJ, Hennerici MG, Meairs S, et al. Mannheim carotid intima-media thickness and plaque consensus (2004-2006-2011). An update on behalf of the advisory board of the 3rd, 4th and 5th watching the risk symposia, at the 13th, 15th and 20th European Stroke Conferences, Mannheim, Germany, 2004, Brussels, Belgium, 2006, and Hamburg, Germany, 2011. *Cerebrovasc Dis* 2012;**34**(4):290-6. doi:10.1159/000343145.
33. Marlatt KL, Kelly AS, Steinberger J, et al. The influence of gender on carotid artery compliance and distensibility in children and adults. *J Clin Ultrasound* 2013;**41**(6):340-6. doi:10.1002/jcu.22015.
34. Koivisto T, Virtanen M, Hutri-Kahonen N, et al. Arterial pulse wave velocity in relation to carotid intima-media thickness, brachial flow-mediated dilation and carotid artery distensibility: the Cardiovascular Risk in Young Finns Study and the Health 2000 Survey. *Atherosclerosis* 2012;**220**(2):387-93. doi:10.1016/j.atherosclerosis.2011.08.007.
35. Juonala M, Jarvisalo MJ, Maki-Torkko N, et al. Risk factors identified in childhood and decreased carotid artery elasticity in adulthood: the Cardiovascular Risk in Young Finns Study. *Circulation* 2005;**112**(10):1486-93. doi:10.1161/CIRCULATIONAHA.104.502161.
36. Bond L, Clements J, Bertalli N, et al. A comparison of self-reported puberty using the Pubertal Development Scale and the Sexual Maturation Scale in a school-based epidemiologic survey. *Journal of Adolescence* 2006;**29**(5):709-20. doi:10.1016/j.adolescence.2005.10.001.
37. Kuczmarski RJ, Ogden CL, Grummer-Strawn LM, et al. CDC growth charts: United States. *Adv Data* 2000(314):1-27.
38. Australian Bureau of S. Census of population and housing: Socio-Economic Indexes for Areas (SEIFA) 2011. Cat. no. 2033.0.55.001, 2011.
39. Heeringa SG, West BT, Berglund PA. *Applied survey data analysis*: CRC Press, 2010.
40. Ellul S, Mensah FK, Grobler A, et al. Technical Paper 1: Development and Use of CheckPoint Sample Weights. Melbourne: Murdoch Children's Research Institute, 2017.
41. Jarvisalo MJ, Jartti L, Nanto-Salonen K, et al. Increased aortic intima-media thickness: a marker of preclinical atherosclerosis in high-risk children. *Circulation* 2001;**104**(24):2943-7.
42. Jourdan C, Wuhl E, Litwin M, et al. Normative values for intima-media thickness and distensibility of large arteries in healthy adolescents. *J Hypertens* 2005;**23**(9):1707-15.
43. Maas AH, Appelman YE. Gender differences in coronary heart disease. *Neth Heart J* 2010;**18**(12):598-602.
44. Carroll RJ. Measurement error in epidemiologic studies. *Encyclopedia of biostatistics* 1998.

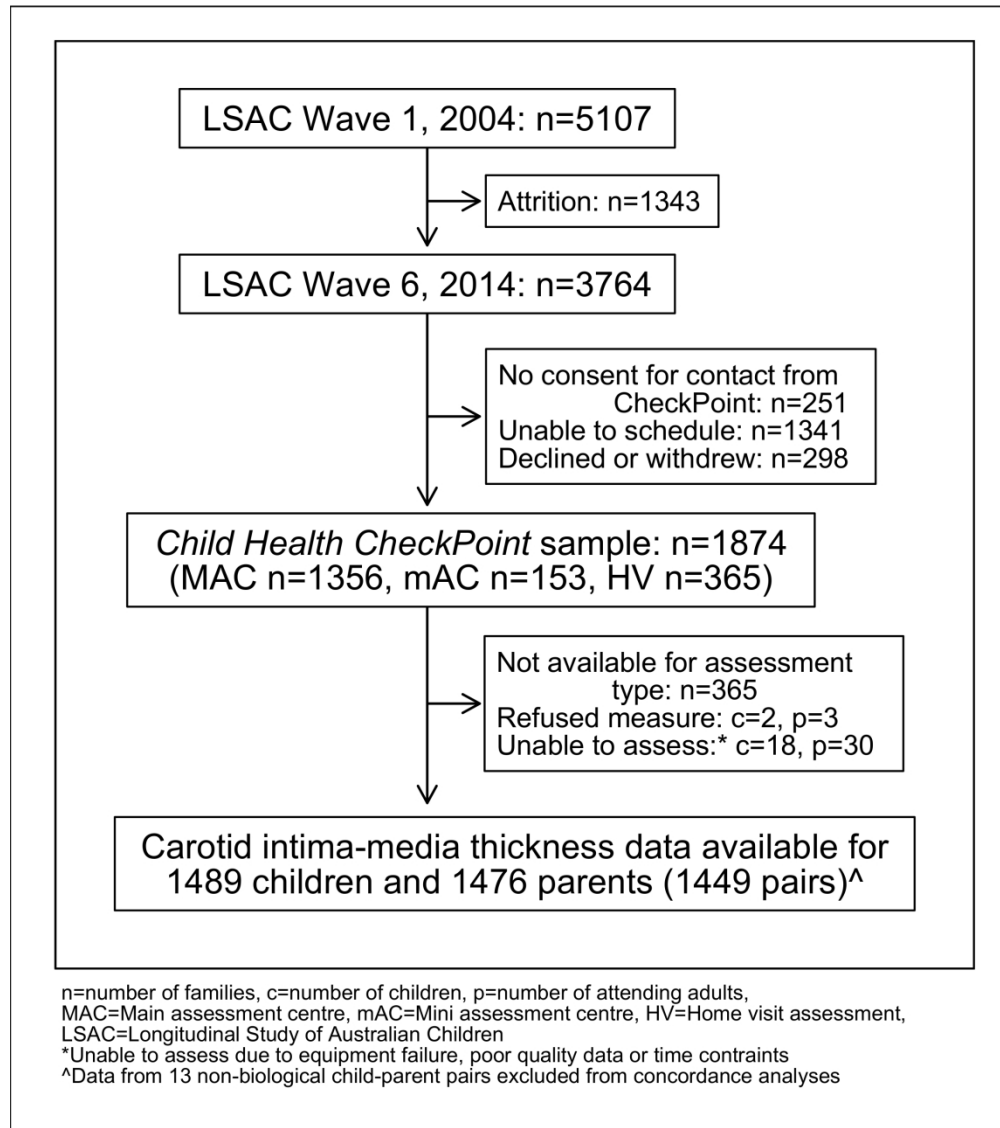

Figure 1. Participant flow chart. n: number of families; c: number of children; p: number of attending adults; MAC: main assessment centre; mAC: mini assessment centre; HV: home visit assessment; LSAC: Longitudinal Study of Australian Children.

508x571mm (600 x 600 DPI)

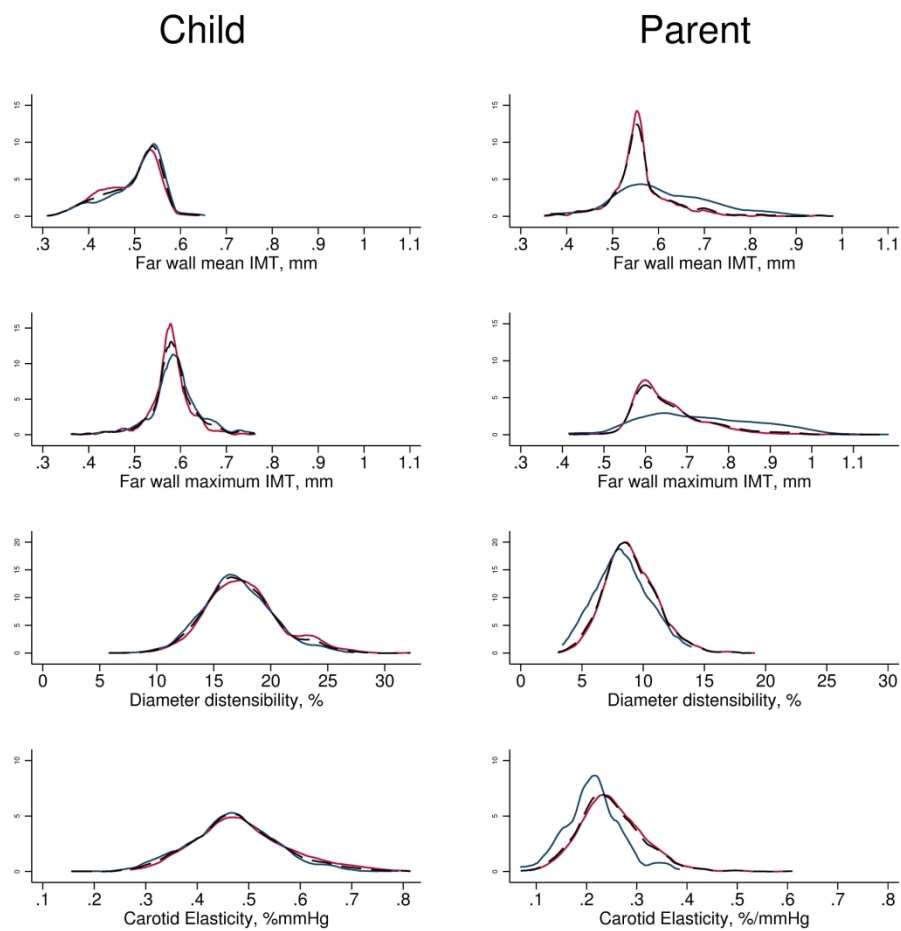

Density plots for each primary and secondary carotid artery outcome. Males (blue), females (red), and both sexes (thin dotted black line) plotted on the same graph for each outcome. X and Y scales common between child and parent, and between mean and maximum IMT variables.

254x254mm (300 x 300 DPI)

## SUPPLEMENTARY MATERIAL

### Carotid artery intima-media thickness, distensibility, and elasticity: Population epidemiology and concordance in Australian 11-12 year old children and their parents

**Authors:** Richard S Liu,<sup>\*1,2</sup> Sophie Dunn,<sup>\*2,3</sup> Anneke Grobler,<sup>2</sup> Katherine Lange,<sup>2</sup> Denise Becker,<sup>2,4</sup> Greta Goldsmith,<sup>2</sup> John Carlin,<sup>2,4</sup> Markus Juonala,<sup>5,6</sup> Melissa Wake,<sup>1,2,7</sup> David P Burgner<sup>1,2,8</sup>

\* RS Liu and S Dunn contributed equally to the study

**Affiliations:** <sup>1</sup>Department of Paediatrics, Faculty of Medicine, Dentistry and Health Services, The University of Melbourne, Parkville, Australia; <sup>2</sup>Murdoch Children's Research Institute, Royal Children's Hospital, Victoria, Australia; <sup>3</sup>Royal Children's Hospital, Parkville, Australia; <sup>4</sup>Melbourne School of Population and Global Health, Faculty of Medicine, Dentistry and Health Services, University of Melbourne, Parkville, Australia; <sup>5</sup>Department of Medicine, University of Turku, Turku, Finland; <sup>6</sup>Division of Medicine, Turku University Hospital, Turku, Finland; <sup>7</sup>Department of Paediatrics and the Liggins Institute, The University of Auckland, Auckland, New Zealand; <sup>8</sup>Department of Paediatrics, Monash University, Melbourne, Australia

Supplementary Table 1. Percentile values for primary and secondary outcomes.

| Characteristic                    | Child     |            |            |            |            |            |            | Parent    |            |            |            |            |            |            |
|-----------------------------------|-----------|------------|------------|------------|------------|------------|------------|-----------|------------|------------|------------|------------|------------|------------|
|                                   | P5        | P10        | P25        | P50        | P75        | P90        | P95        | P5        | P10        | P25        | P50        | P75        | P90        | P95        |
| <b>Far wall mean IMT, mm</b>      | <b>P5</b> | <b>P10</b> | <b>P25</b> | <b>P50</b> | <b>P75</b> | <b>P90</b> | <b>P95</b> | <b>P5</b> | <b>P10</b> | <b>P25</b> | <b>P50</b> | <b>P75</b> | <b>P90</b> | <b>P95</b> |
| Male                              | 0.382     | 0.404      | 0.472      | 0.520      | 0.546      | 0.560      | 0.566      | 0.454     | 0.502      | 0.540      | 0.592      | 0.684      | 0.744      | 0.816      |
| Female                            | 0.384     | 0.402      | 0.446      | 0.512      | 0.538      | 0.556      | 0.560      | 0.462     | 0.498      | 0.532      | 0.554      | 0.576      | 0.638      | 0.684      |
| All                               | 0.382     | 0.404      | 0.458      | 0.518      | 0.540      | 0.560      | 0.563      | 0.462     | 0.500      | 0.532      | 0.556      | 0.588      | 0.658      | 0.706      |
| <b>Far wall maximum IMT, mm</b>   | <b>P5</b> | <b>P10</b> | <b>P25</b> | <b>P50</b> | <b>P75</b> | <b>P90</b> | <b>P95</b> | <b>P5</b> | <b>P10</b> | <b>P25</b> | <b>P50</b> | <b>P75</b> | <b>P90</b> | <b>P95</b> |
| Male                              | 0.500     | 0.528      | 0.564      | 0.590      | 0.614      | 0.654      | 0.680      | 0.566     | 0.586      | 0.622      | 0.716      | 0.836      | 0.930      | 0.970      |
| Female                            | 0.504     | 0.530      | 0.560      | 0.580      | 0.598      | 0.628      | 0.646      | 0.562     | 0.572      | 0.594      | 0.630      | 0.688      | 0.768      | 0.812      |
| All                               | 0.502     | 0.528      | 0.562      | 0.580      | 0.606      | 0.640      | 0.666      | 0.564     | 0.574      | 0.596      | 0.638      | 0.706      | 0.796      | 0.858      |
| <b>Diameter distensibility, %</b> | <b>P5</b> | <b>P10</b> | <b>P25</b> | <b>P50</b> | <b>P75</b> | <b>P90</b> | <b>P95</b> | <b>P5</b> | <b>P10</b> | <b>P25</b> | <b>P50</b> | <b>P75</b> | <b>P90</b> | <b>P95</b> |
| Male                              | 12.4      | 13.2       | 15.1       | 16.8       | 19.0       | 21.0       | 22.1       | 4.7       | 5.4        | 6.9        | 8.1        | 9.5        | 11.0       | 11.9       |
| Female                            | 12.6      | 13.9       | 15.5       | 17.4       | 19.4       | 22.3       | 23.8       | 5.8       | 6.5        | 7.6        | 8.8        | 10.4       | 11.8       | 12.8       |
| All                               | 12.5      | 13.6       | 15.3       | 17.1       | 19.2       | 21.4       | 23.3       | 5.6       | 6.3        | 7.5        | 8.7        | 10.3       | 11.7       | 12.8       |
| <b>Carotid Elasticity, %/mmHg</b> | <b>P5</b> | <b>P10</b> | <b>P25</b> | <b>P50</b> | <b>P75</b> | <b>P90</b> | <b>P95</b> | <b>P5</b> | <b>P10</b> | <b>P25</b> | <b>P50</b> | <b>P75</b> | <b>P90</b> | <b>P95</b> |
| Male                              | 0.325     | 0.360      | 0.418      | 0.469      | 0.524      | 0.575      | 0.616      | 0.126     | 0.144      | 0.175      | 0.211      | 0.242      | 0.274      | 0.306      |
| Female                            | 0.349     | 0.376      | 0.427      | 0.479      | 0.542      | 0.620      | 0.660      | 0.156     | 0.177      | 0.209      | 0.246      | 0.291      | 0.335      | 0.362      |
| All                               | 0.339     | 0.368      | 0.422      | 0.472      | 0.532      | 0.596      | 0.645      | 0.151     | 0.171      | 0.207      | 0.242      | 0.285      | 0.332      | 0.355      |

IMT: intima-media thickness, PX: value of X<sup>th</sup> percentile, e.g. P50 = median

**STROBE 2007 (v4) Statement—Checklist of items that should be included in reports of *cohort studies***

| Section/Topic            | Item # | Recommendation                                                                                                                                                                       | Reported on page # | Line numbers; (page) line;                 |
|--------------------------|--------|--------------------------------------------------------------------------------------------------------------------------------------------------------------------------------------|--------------------|--------------------------------------------|
| Title and abstract       | 1      | (a) Indicate the study's design with a commonly used term in the title or the abstract                                                                                               | 1-2                | 1-3, 5-6                                   |
|                          |        | (b) Provide in the abstract an informative and balanced summary of what was done and what was found                                                                                  | 2, 3               | (p2)9-12, (p3)1-3                          |
| <b>Introduction</b>      |        |                                                                                                                                                                                      |                    |                                            |
| Background/rationale     | 2      | Explain the scientific background and rationale for the investigation being reported                                                                                                 | 4                  | 3-18, 23-24, 26-27                         |
| Objectives               | 3      | State specific objectives, including any prespecified hypotheses                                                                                                                     | 5                  | 11-13                                      |
| <b>Methods</b>           |        |                                                                                                                                                                                      |                    |                                            |
| Study design             | 4      | Present key elements of study design early in the paper                                                                                                                              | 5                  | 18                                         |
| Setting                  | 5      | Describe the setting, locations, and relevant dates, including periods of recruitment, exposure, follow-up, and data collection                                                      | 5, 6               | (p5) 18-29<br>(p6) 4-15                    |
| Participants             | 6      | (a) Give the eligibility criteria, and the sources and methods of selection of participants. Describe methods of follow-up                                                           | 5                  | 18-22                                      |
|                          |        | (b) For matched studies, give matching criteria and number of exposed and unexposed                                                                                                  | NA                 | NA                                         |
| Variables                | 7      | Clearly define all outcomes, exposures, predictors, potential confounders, and effect modifiers. Give diagnostic criteria, if applicable                                             | 7-9                | (p7)17-21, 23-36; (p8) 4-14;<br>(p9) 10-16 |
| Data sources/measurement | 8*     | For each variable of interest, give sources of data and details of methods of assessment (measurement). Describe comparability of assessment methods if there is more than one group | 6-9                | All                                        |
| Bias                     | 9      | Describe any efforts to address potential sources of bias                                                                                                                            | 9                  | 22-27                                      |
| Study size               | 10     | Explain how the study size was arrived at                                                                                                                                            | 5                  | 23-29                                      |
| Quantitative variables   | 11     | Explain how quantitative variables were handled in the analyses. If applicable, describe which groupings were chosen and why                                                         | 7-9                |                                            |
| Statistical methods      | 12     | (a) Describe all statistical methods, including those used to control for confounding                                                                                                | 9                  | 10-27                                      |
|                          |        | (b) Describe any methods used to examine subgroups and interactions                                                                                                                  | 9                  | 12-21                                      |
|                          |        | (c) Explain how missing data were addressed                                                                                                                                          | 9                  | 17-21                                      |
|                          |        | (d) If applicable, explain how loss to follow-up was addressed                                                                                                                       | 9                  | 17-21                                      |



|                          |     |                                                                                                                                                                                                              |                                                  |                           |
|--------------------------|-----|--------------------------------------------------------------------------------------------------------------------------------------------------------------------------------------------------------------|--------------------------------------------------|---------------------------|
|                          |     | (e) Describe any sensitivity analyses                                                                                                                                                                        | NA                                               | NA                        |
| <b>Results</b>           |     |                                                                                                                                                                                                              |                                                  |                           |
| Participants             | 13* | (a) Report numbers of individuals at each stage of study—eg numbers potentially eligible, examined for eligibility, confirmed eligible, included in the study, completing follow-up, and analysed            | Figure 1                                         | Additional document       |
|                          |     | (b) Give reasons for non-participation at each stage                                                                                                                                                         | Figure 1                                         | Additional document       |
|                          |     | (c) Consider use of a flow diagram                                                                                                                                                                           | Figure 1                                         | Additional document       |
| Descriptive data         | 14* | (a) Give characteristics of study participants (eg demographic, clinical, social) and information on exposures and potential confounders                                                                     | Table 1, page 11                                 | NA                        |
|                          |     | (b) Indicate number of participants with missing data for each variable of interest                                                                                                                          | Figure 1<br>Table 1, page 11<br>Table 2, page 14 | Add document<br>NA<br>NA  |
|                          |     | (c) Summarise follow-up time (eg, average and total amount)                                                                                                                                                  | NA                                               | NA                        |
| Outcome data             | 15* | Report numbers of outcome events or summary measures over time                                                                                                                                               | Table 2, page 14                                 | NA                        |
| Main results             | 16  | (a) Give unadjusted estimates and, if applicable, confounder-adjusted estimates and their precision (eg, 95% confidence interval). Make clear which confounders were adjusted for and why they were included | Table 2, page 14                                 | NA                        |
|                          |     | (b) Report category boundaries when continuous variables were categorized                                                                                                                                    | Table 2, page 14                                 | NA                        |
|                          |     | (c) If relevant, consider translating estimates of relative risk into absolute risk for a meaningful time period                                                                                             | NA                                               | NA                        |
| Other analyses           | 17  | Report other analyses done—eg analyses of subgroups and interactions, and sensitivity analyses                                                                                                               | Table 3, page 16<br>+ page 17                    | NA                        |
| <b>Discussion</b>        |     |                                                                                                                                                                                                              |                                                  |                           |
| Key results              | 18  | Summarise key results with reference to study objectives                                                                                                                                                     | 17                                               | 10-15                     |
| <b>Limitations</b>       |     |                                                                                                                                                                                                              |                                                  |                           |
| Interpretation           | 20  | Give a cautious overall interpretation of results considering objectives, limitations, multiplicity of analyses, results from similar studies, and other relevant evidence                                   | 18-19                                            | (p18) 8-32; (p19) 106     |
| Generalisability         | 21  | Discuss the generalisability (external validity) of the study results                                                                                                                                        | 18-19                                            | (p18) 8-21,<br>(p19)8-16  |
| <b>Other information</b> |     |                                                                                                                                                                                                              |                                                  |                           |
| Funding                  | 22  | Give the source of funding and the role of the funders for the present study and, if applicable, for the original study on which the present article is based                                                | 20-21                                            | (p20) 20-30;<br>P(21) 1-8 |

1  
2  
3  
4  
5 \*Give information separately for cases and controls in case-control studies and, if applicable, for exposed and unexposed groups in cohort and cross-sectional studies.  
6

7 **Note:** An Explanation and Elaboration article discusses each checklist item and gives methodological background and published examples of transparent reporting. The STROBE  
8 checklist is best used in conjunction with this article (freely available on the Web sites of PLoS Medicine at <http://www.plosmedicine.org/>, Annals of Internal Medicine at  
9 <http://www.annals.org/>, and Epidemiology at <http://www.epidem.com/>). Information on the STROBE Initiative is available at [www.strobe-statement.org](http://www.strobe-statement.org).  
10  
11  
12  
13  
14  
15  
16  
17  
18  
19  
20  
21  
22  
23  
24  
25  
26  
27  
28  
29  
30  
31  
32  
33  
34  
35  
36  
37  
38  
39  
40  
41  
42  
43  
44  
45  
46  
47

For peer review only

# BMJ Open

## Carotid artery intima-media thickness, distensibility, and elasticity: Population epidemiology and concordance in Australian 11-12 year old children and their parents

|                                 |                                                                                                                                                                                                                                                                                                                                                                                                                                                                                                                                                                                                                                                                                                                                                                                                                                                                                                                                                                                                                              |
|---------------------------------|------------------------------------------------------------------------------------------------------------------------------------------------------------------------------------------------------------------------------------------------------------------------------------------------------------------------------------------------------------------------------------------------------------------------------------------------------------------------------------------------------------------------------------------------------------------------------------------------------------------------------------------------------------------------------------------------------------------------------------------------------------------------------------------------------------------------------------------------------------------------------------------------------------------------------------------------------------------------------------------------------------------------------|
| Journal:                        | <i>BMJ Open</i>                                                                                                                                                                                                                                                                                                                                                                                                                                                                                                                                                                                                                                                                                                                                                                                                                                                                                                                                                                                                              |
| Manuscript ID                   | bmjopen-2017-020264.R1                                                                                                                                                                                                                                                                                                                                                                                                                                                                                                                                                                                                                                                                                                                                                                                                                                                                                                                                                                                                       |
| Article Type:                   | Research                                                                                                                                                                                                                                                                                                                                                                                                                                                                                                                                                                                                                                                                                                                                                                                                                                                                                                                                                                                                                     |
| Date Submitted by the Author:   | 02-Mar-2018                                                                                                                                                                                                                                                                                                                                                                                                                                                                                                                                                                                                                                                                                                                                                                                                                                                                                                                                                                                                                  |
| Complete List of Authors:       | Liu, Richard; The University of Melbourne, Department of Paediatrics; Murdoch Children's Research Institute<br>Dunn, Sophie; Murdoch Children's Research Institute; Royal Children's Hospital, Emergency Department<br>Grobler, Anneke; Murdoch Children's Research Institute<br>Lange, Katherine; Murdoch Children's Research Institute<br>Becker, Denise; Murdoch Children's Research Institute; University of Melbourne, Melbourne School of Population and Global Health<br>Goldsmith, Greta ; Murdoch Children's Research Institute<br>Carlin, John; Murdoch Children's Research Institute; University of Melbourne, Melbourne School of Population and Global Health<br>Juonala, Markus; University of Turku, Department of Medicine; Turku University Hospital, Division of Medicine<br>Wake, Melissa; Murdoch Children's Research Institute; The University of Melbourne, Department of Paediatrics<br>Burgner, David; Murdoch Children's Research Institute; The University of Melbourne, Department of Paediatrics |
| <b>Primary Subject Heading</b>: | Epidemiology                                                                                                                                                                                                                                                                                                                                                                                                                                                                                                                                                                                                                                                                                                                                                                                                                                                                                                                                                                                                                 |
| Secondary Subject Heading:      | Paediatrics, Public health, Cardiovascular medicine, Radiology and imaging                                                                                                                                                                                                                                                                                                                                                                                                                                                                                                                                                                                                                                                                                                                                                                                                                                                                                                                                                   |
| Keywords:                       | Intima-media thickness, Distensibility, Reference values, Children, Inheritance patterns, Epidemiological studies                                                                                                                                                                                                                                                                                                                                                                                                                                                                                                                                                                                                                                                                                                                                                                                                                                                                                                            |
|                                 |                                                                                                                                                                                                                                                                                                                                                                                                                                                                                                                                                                                                                                                                                                                                                                                                                                                                                                                                                                                                                              |

SCHOLARONE™  
Manuscripts

1  
2  
3 1 **Carotid artery intima-media thickness, distensibility, and elasticity: Population**  
4 2 **epidemiology and concordance in Australian 11-12 year old children and their parents**  
5  
6 3

7  
8 4 **Authors:** Richard S Liu,<sup>\*1,2</sup> Sophie Dunn,<sup>\*2,3</sup> Anneke Grobler,<sup>2</sup> Katherine Lange,<sup>2</sup> Denise  
9 5 Becker,<sup>2,4</sup> Greta Goldsmith,<sup>2</sup> John Carlin,<sup>2,4</sup> Markus Juonala,<sup>5,6</sup> Melissa Wake,<sup>1,2,7</sup> David P  
10 6 Burgner<sup>1,2,8</sup>

11  
12 7 \* RS Liu and S Dunn contributed equally to the study  
13  
14 8

15  
16 9 **Affiliations:** <sup>1</sup>Department of Paediatrics, Faculty of Medicine, Dentistry and Health Services,  
17 10 The University of Melbourne, Parkville, VIC, Australia; <sup>2</sup>Murdoch Children's Research  
18 11 Institute, Royal Children's Hospital, Parkville, VIC, Australia; <sup>3</sup>Emergency Department,  
19 12 Royal Children's Hospital, Parkville, VIC, Australia, <sup>4</sup>Melbourne School of Population and  
20 13 Global Health, Faculty of Medicine, Dentistry and Health Services, University of Melbourne,  
21 14 Parkville, VIC, Australia; <sup>5</sup>Department of Medicine, University of Turku, Turku, Finland;  
22 15 <sup>6</sup>Division of Medicine, Turku University Hospital, Turku, Finland; <sup>7</sup>Department of  
23 16 Paediatrics and the Liggins Institute, The University of Auckland, Auckland, New Zealand;  
24 17 <sup>8</sup>Department of Paediatrics, Monash University, Melbourne, VIC, Australia  
25  
26  
27  
28  
29  
30  
31

32 19 **Correspondence to:** Professor Melissa Wake  
33 20 Murdoch Children's Research Institute  
34 21 The Royal Children's Hospital  
35 22 50 Flemington Road, Parkville VIC 3052, AUSTRALIA  
36 23 T: +61 3 9345 5761  
37 24 E: [melissa.wake@mcri.edu.au](mailto:melissa.wake@mcri.edu.au)  
38  
39  
40  
41  
42

43 26 **Keywords:** intima-media thickness, distensibility, elasticity, reference values, parents,  
44 27 children, inheritance patterns, correlation studies, epidemiologic studies, cross-sectional  
45 28 studies  
46  
47  
48  
49

50 30 **Word count:** 2415 + 96 + 303 + 1024 = 3838  
51 31  
52 32  
53 33  
54  
55  
56  
57  
58  
59  
60

1 **Abbreviations:** BMI: body mass index; CC: Pearson's correlation coefficient ; CDC: Centers  
2 for Disease Control and Prevention; CheckPoint: Child Health CheckPoint; CI: confidence  
3 interval ;CVD: cardiovascular disease; Disadvantage Index: The Index of Relative  
4 Socioeconomic Disadvantage; ECG: electrocardiogram; ERC: estimated regression coefficient;  
5 IMT: intima-media thickness; IQR: Interquartile Range; LD: lumen diameter; LSAC:  
6 Longitudinal Study of Australian Children; MCRI: The Murdoch Children's Research  
7 Institute; MHz: megahertz; mm millimetres; SD: standard deviation; VD: vessel diameter

8  
9  
10  
11  
12  
13  
14  
15  
16  
17  
18  
19  
20  
21  
22  
23  
24  
25  
26  
27  
28  
29  
30  
31  
32  
33  
34  
35  
36  
37  
38  
39  
40  
41  
42  
43  
44  
45  
46  
47  
48  
49  
50  
51  
52  
53  
54  
55  
56  
57  
58  
59  
60

For peer review only

1  
2  
3  
4  
5  
6  
7  
8  
9  
10  
11  
12  
13  
14  
15  
16  
17  
18  
19  
20  
21  
22  
23  
24  
25  
26  
27  
28  
29  
30  
31  
32  
33  
34  
35  
36  
37  
38  
39  
40  
41  
42  
43  
44  
45  
46  
47  
48  
49  
50  
51  
52  
53  
54  
55  
56  
57  
58  
59  
60

## 1 ABSTRACT

2 **Objectives:** To describe a well-established marker of cardiovascular risk, carotid intima-media thickness (IMT), and related measures (artery distensibility and elasticity) in 11-12-year-old children and mid-life adults, and examine associations within parent-child dyads.

3 **Design:** Cross-sectional study (Child Health CheckPoint), nested within a prospective cohort study, the Longitudinal Study of Australian Children (LSAC).

4 **Setting:** Assessment centres in six Australian major cities and eight selected regional towns, Feb 2015-Mar 2016.

5 **Participants:** Of all participating CheckPoint families (n=1874), 1489 children (50.0% girls) and 1476 parents (86.8% mothers) with carotid IMT data were included. Survey weights and methods were applied to account for LSAC's complex sample design and clustering within postcodes and strata.

6 **Outcome measures:** Ultrasound of the right carotid artery was performed using standardised protocols. Primary outcomes were mean and maximum far-wall carotid IMT, quantified using semi-automated edge-detection software. Secondary outcomes were carotid artery distensibility and elasticity. Pearson's correlation coefficients and multivariable linear regression models were used to assess parent-child concordance. Random effects modelling on a subset of ultrasounds (with repeated measurements) were used to assess reliability of the child carotid IMT measure.

7 **Results:** The average mean and maximum child carotid IMT were 0.50 mm (standard deviation, SD, 0.06) and 0.58 mm (SD 0.05) respectively. In adults, average mean and maximum carotid IMT were 0.57 mm (SD 0.07) and 0.66 mm (SD 0.10) respectively. Mother-child correlations for mean and maximum carotid IMT were 0.12 (95% CI 0.05 to 0.23) and 0.10 (95% CI 0.03 to 0.21) respectively. For carotid artery distensibility and elasticity, mother-child correlations were 0.19 (95% CI 0.10 to 0.25) and 0.11 (95% CI 0.02 to 0.18), respectively. There was no strong evidence of father-child correlation in any measure.

8 **Conclusions:** We provide Australian values for carotid vascular measures, and report a modest mother-child concordance. Both genetic and environmental exposures are likely to contribute to carotid IMT.

1  
2  
3 1 **Strengths and limitations of this study**

- 4 2 • This is the largest cross-sectional study to investigate carotid IMT concordance in  
5 3 parent-child dyads  
6 4 • Population-based sampling of children provides an additional Australian reference for  
7 5 future studies investigating carotid IMT  
8 6 • Our study sample contained a large proportion of mothers, limiting generalisability of  
9 7 our concordance findings for fathers  
10 8  
11 9  
12 10

13  
14  
15  
16  
17  
18  
19  
20  
21  
22  
23  
24  
25  
26  
27  
28  
29  
30  
31  
32  
33  
34  
35  
36  
37  
38  
39  
40  
41  
42  
43  
44  
45  
46  
47  
48  
49  
50  
51  
52  
53  
54  
55  
56  
57  
58  
59  
60

For peer review only

## 1 INTRODUCTION

2 Atherosclerosis has a long pre-clinical latency that begins in early life; this affords multiple  
3 opportunities for early prevention and intervention.<sup>1 2</sup> Traditional cardiovascular disease  
4 (CVD) risk factors are predictive of outcomes in adults, but do not capture the total risk.<sup>3</sup>  
5 Widely-used CVD screening tools for adults (such as the Framingham Risk Score) predict  
6 only 60-65% of CVD risk,<sup>3</sup> and CVD events increasingly occur in many who have no  
7 traditional risk factors.<sup>4</sup> Non-invasive risk assessment, such as carotid intima-media thickness  
8 (IMT), may facilitate earlier intervention<sup>5</sup> by improving CVD risk prediction and  
9 stratification for intermediate-risk individuals.<sup>3</sup>

10 Carotid IMT is a non-invasive ultrasound technique that measures the thickness of the intimal  
11 and medial layers of the carotid artery. It is a marker of early subclinical total atherosclerotic  
12 burden.<sup>6-11</sup> Pignoli *et al*<sup>12</sup> first demonstrated B-mode ultrasound-assisted measurement of the  
13 intima and media layers of the carotid artery, *in vivo* at the time of autopsy, reflecting the  
14 direct measurement of atherosclerotic burden at that site. The extent of coronary artery  
15 atherosclerosis also correlated with carotid IMT in a large clinical population of high risk  
16 individuals.<sup>13 14</sup> Carotid IMT reflect the burden of multiple cardiovascular risk factors,<sup>15</sup>  
17 predict future cardiovascular events (including stroke and myocardial infarction),<sup>16-18</sup> and has  
18 the potential to be used as a CVD screening tool in addition to existing risk scores.<sup>3 19</sup>

19 Functional artery measurements may also provide a sensitive marker of CVD risk. In adults,  
20 decreased arterial distensibility and elasticity have been observed in hypertensive patients<sup>20</sup>  
21 and those with diabetes,<sup>21</sup> but their use in stroke and myocardial infarction are of uncertain  
22 value.

23 Few studies have examined the distribution of carotid IMT and related vascular measures,  
24 such as arterial distensibility and elasticity, in children. One of the largest studies to date<sup>22</sup>  
25 assessed 1155 children aged between 6-18 years and developed sex-specific reference charts  
26 normalised to age and height. Given the lack of outcome data linking childhood artery  
27 parameters with adult CVD, the meaning of these reference values remains uncertain.  
28 Nonetheless, functional and structural measures of vascular health as predictors of CVD may  
29 be particularly important for children because of the greater potential for reducing  
30 atherosclerosis by modifying CVD risk factors early in life.<sup>23-25</sup>

31 The relative contribution of shared and unshared factors to carotid artery parameters has  
32 important implications for the design of interventions to modify CVD risk. Parent-child  
33 concordance is a unique opportunity to add additional important information in the



1 calculation of these relative contributions, leveraging the unique genetic and environmental  
2 exposures parents and their children share. Carotid IMT is known to be modestly heritable,  
3 however estimates are largely derived from studies of twins<sup>26</sup> or older participants.<sup>27 28</sup> One  
4 study reported modest parent-child heritability ( $h^2 < 30\%$ ).<sup>29</sup> Understanding parent-child  
5 concordance in a larger population based cohort could clarify sex differences and examine  
6 the generalisability of earlier findings.

7 The Child Health CheckPoint nested within *Growing Up in Australia* (also known as the  
8 Longitudinal Study of Australian Children, LSAC) offers a unique opportunity to report  
9 cross-sectional carotid artery phenotypes in Australian parent-child dyads measured on the  
10 same day using the same protocols. We aimed to (1) describe, in 11-12-year-old Australian  
11 children and their parents, the distribution of carotid IMT and related measures (artery  
12 distensibility and elasticity), and (2) to analyse parent-child concordance. In addition, we use  
13 repeated readings on a subset of child films by both the same and a different rater to estimate  
14 the magnitude of measurement error in carotid IMT readings.

## 16 METHODS

17 **Study Design and Participants:** Details of the initial study design and recruitment are  
18 outlined elsewhere.<sup>30 31</sup> Briefly, LSAC recruited a nationally representative B cohort of 5107  
19 infants using a 2-stage random sampling design with postcode as primary sampling unit, and  
20 followed them up in biennial 'waves' of data collection up to 2015. The initial recruitment  
21 rate in 2004 was 57.2%, of whom 73.7% (n=3764) were retained to LSAC wave 6 in 2014.

22 At the wave 6 visit, all contactable and consenting families (n=3513) were invited to consent  
23 to their contact details being shared with the Child Health CheckPoint team. In 2015,  
24 families that consented were then sent an information pack via post and received an  
25 information and recruitment phone call. The CheckPoint's detailed cross-sectional  
26 biophysical assessment (the Child Health CheckPoint), nested between LSAC waves 6 and 7  
27 (aged 11-12 years), took place between February 2015 and March 2016 (see detailed  
28 description of CheckPoint methods<sup>32 33</sup>). 1874 families participated.

29 **Ethics and Consent:** The CheckPoint data collection protocol was approved by The Royal  
30 Children's Hospital (Melbourne, Australia) Human Research Ethics Committee (33225D)  
31 and The Australian Institute of Family Studies Ethics Committee (14-26). The attending  
32 parents/caregivers provided written informed consent for themselves and their children to  
33 participate in the study.

1 **Procedure:** Common carotid artery IMT, lumen diameter, height, weight and puberty status  
2 were collected at a specialised 3.5 hour (major cities) or 2.5 hour (smaller regional centres)  
3 CheckPoint assessment centre visit. Those families (n=378) who could not arrange a visit  
4 were offered a home visit with a reduced protocol excluding carotid ultrasound; their data are  
5 not included (figure 1). Participating families were included in the current analyses if carotid  
6 artery data from CheckPoint were available (figure 1). Parents were excluded from  
7 correlation analyses if they were non-biological caregivers.

8 Participants underwent carotid ultrasound, vascular stiffness assessment, and blood pressure  
9 measurement in a specialised 15-min station (called “Heart Lab”), which was within the first  
10 hour of arrival at the assessment centre visit. Participants were semi-fasted and ultrasound  
11 assessment was performed prior to exercise testing and salbutamol administration (part of the  
12 respiratory function assessment).

13 **Carotid artery ultrasound:** Carotid artery images were acquired using standardised  
14 protocols developed in accordance with recommendations of the American Society of  
15 Echocardiography and Mannheim Consensus statements.<sup>18 34</sup> All participants lay supine with  
16 their head turned 45 degrees to the left to expose the right side of neck. The right carotid  
17 artery was chosen to harmonise with other vascular measures taken in Heart Lab, such as  
18 pulse wave velocity, which also assessed the right-sided circulation. Ultrasound images were  
19 obtained using a portable ultrasound machine and 10 megahertz (MHz) linear array probe  
20 (Vivid-I, GE Healthcare, Chicago, IL, USA). Image acquisition occurred in two distinct  
21 phases. First, to confirm imaging location, technicians visualised a cross-section of arterial  
22 lumens both above and below the carotid bifurcation. Subsequent rotation of the probe, in the  
23 second phase of acquisition, allowed technicians to acquire a longitudinal image of the  
24 common carotid artery and proximal section of the carotid bulb. The carotid bulb was  
25 identifiable by its characteristic anatomical structure, close to the bifurcation (Figure 2). The  
26 angle of imaging was chosen, in the absence of a Meijer Carotid Arc, at approximately 45  
27 degrees to the midline. Images were generally acquired at an angle such that the overlying  
28 internal jugular vein lay between the artery and the probe, producing the highest quality  
29 image. The duration of the captured real-time B-mode ultrasound cine-loops were 10 cardiac  
30 cycles. These were captured in triplicate by one of four trained technicians. We used a  
31 modified 3-lead electrocardiogram (ECG) to record heart rhythm concurrently.

32 **Image processing and quality:** All images were reviewed by one technician to select loops  
33 that met key optimisation parameters: a clear near and far wall intima-media, clear lumen,

1 straight vessel, presence of the carotid bulb and an ECG trace. The best quality 5-7 cardiac  
2 cycle section of the loops were trimmed and extracted. Quality of the trimmed images were  
3 graded for wall clarity; length of clarity; position of clarity relative to carotid blub; clear  
4 lumen; and straightness of vessel, on a subjective 1-4 scale.

5 **Mean and maximum carotid intima-media thickness:** These loops were further processed  
6 using Carotid Analyzer (Medical Imaging Applications, Coralville, IA, USA), a  
7 commercially available semi-automatic edge detection software program.<sup>35 36</sup> Raters  
8 calibrated the images using ultrasound image markers. Intima-media thickness was measured  
9 – at the vessel region of highest quality, approximately 10 mm (millimetres) from the carotid  
10 bulb – using the software’s semi-automated measurement protocol. After algorithmic  
11 detection of the intima-media interface over the entire cine-loop, frames were manually  
12 adjusted as needed or rejected if the intima-media interface was unclear or blurred.

13 Three to five frames, at end-diastole (R wave on the ECG) from the entire cine-loop of  
14 images, were selected for analysis. Carotid IMT values were presented as the mean of 3-5  
15 still frames of IMT. We presented both ‘mean’ carotid IMT measurements, which referred to  
16 the 3-5 frame average of the average carotid IMT over the 5-10 mm section, as well as  
17 ‘maximum’ carotid IMT, which refer to the 3-5 frame average of the thickest point of carotid  
18 IMT measurement over the 5-10 mm section.

1 **Vessel and lumen diameter:** Minimal vessel diameter at end diastole was calculated as the  
2 average media-media distance on each of the 3-5 still frames used to calculate mean and  
3 maximum carotid IMT. Lumen diameter was calculated by measuring the average intima-  
4 intima distance (subtracting near and far wall IMT measurements).

5 **Reliability of child carotid IMT readings:** Six trained raters analysed all cine-loops.  
6 Training consisted of 30 example cine-loops that were subsequently assessed for consistency  
7 by an expert rater (RL). Inter- and intra-rater reliability was assessed by reanalysing a subset  
8 of 105 randomly-selected images four times at the end of the scoring process. Images were  
9 reassessed twice each by two raters in a balanced incomplete block design as not all raters  
10 assessed the complete subset. This allowed estimation of the repeatability of measurements  
11 made by the same rater and the reproducibility of measurements made by different raters.  
12 Image acquisition was only performed once.

13 **Other carotid arterial measures:** Further measures of carotid artery distensibility and  
14 elasticity were calculated from carotid artery images as follows.

15 Carotid arterial distensibility (%) was calculated as previously described,<sup>37</sup> automatically  
16 from Carotid Analyzer, based on maximum and minimum media-media vessel diameter (VD)  
17 frame pairs in the cine-loop:

$$\frac{VD_{max} - VD_{min}}{VD_{min}} \times 100\%$$

18 Carotid arterial elasticity (%/mmHg) was derived using intima-intima lumen diameter (LD),  
19 according to previously published work from the Cardiovascular Risk in Young Finns  
20 Study<sup>38 39</sup> and other related studies:<sup>37</sup>

$$\frac{\left(\frac{LD_{max} - LD_{min}}{LD_{min}}\right)}{\Delta P} \times 100\%$$

21 Measurements of VD and LD were automated and rater-independent.

1 **Other sample characteristics:** Measurement of other sample characteristics are outlined in  
2 detail elsewhere.<sup>32</sup> Briefly, age was calculated to nearest week using date of birth, either  
3 imported from the Medicare Australia enrolment database (child) or self-reported (parent),  
4 and date of assessment. Child sex was exported from the Medicare Australia enrolment  
5 database. Pubertal stage was self-reported and further categorised using the Pubertal  
6 Development Scale.<sup>40</sup> We considered any child who was in the early pubertal category or  
7 above as having started puberty. Adult sex was self-reported.

8 Anthropomorphic measurements were taken as previously described.<sup>32</sup> Body mass index  
9 (BMI) was calculated as weight (kg) divided by height (m) squared. For children, an age- and  
10 sex-adjusted BMI z-score was calculated using the US Centers for Disease Control and  
11 Prevention (CDC) growth reference charts.<sup>41</sup> Blood pressure was measured via SphygmoCor  
12 XCEL (AtCor Medical Pty Ltd., West Ryde, NSW, Australia). Following seven minutes in  
13 supine position at rest, systolic and diastolic blood pressures were measured at the brachial  
14 artery up to three times, with mean values reported.

15 Socio-Economic Indexes for Areas scores of the postcode region where the participating  
16 family lived were used as a measure of neighbourhood socioeconomic position. The Index of  
17 Relative Socioeconomic Disadvantage (Disadvantage Index) was a standardised score by  
18 geographic area compiled from 2011 Australian Census data, to numerically summarise the  
19 social and economic conditions of Australian neighbourhoods (national mean of 1000 and a  
20 standard deviation (SD) of 100, where higher values represent less disadvantage).<sup>42</sup>

21 Parents self-reported diabetes requiring medical treatment, high cholesterol requiring medical  
22 treatment, heart conditions, pre-existing hypertension and the presence of a pacemaker were  
23 self-reported in a questionnaire at the assessment centre. Parental and home smoking  
24 behaviour was asked at each LSAC wave. Parents reported children's exposure to second-  
25 hand smoke as follows: "Including yourself, how many people who live with you smoke  
26 inside the house?" If parents' ever answered more than one person, children were considered  
27 exposed. Parents were classified as *ever* smokers if they ever answered yes to the question  
28 "Have you ever smoked?" or "Are you currently smoking?" Parents were classified as  
29 *current* smoker if yes was the most recent answer to "Are you currently smoking?"

1 **Statistical analysis:** Concordance between parents and children was assessed by: 1)  
2 Pearson's correlation coefficients with 95% confidence intervals; and 2) linear regression  
3 with child variable as dependent variable and parent variable as independent variable. Linear  
4 regression models were adjusted for parent and child age, parent and child height, child  
5 lumen diameter, Disadvantage Index, and parent and child sex, in models including both  
6 sexes. In addition, the Pearson's correlation coefficient and linear regression analyses were  
7 repeated using weighted multi-level survey analyses, and became the main reported analyses.

8 Population summary statistics and proportions were estimated by applying survey weights  
9 and survey procedures that corrected for sampling, participation and non-response biases, and  
10 took into account clustering in the sampling frame. Standard errors were calculated taking  
11 into account the complex design and weights.<sup>43</sup> More detail on the calculation of weights is  
12 provided elsewhere.<sup>44</sup>

13 In our reliability analysis, we modelled repeated measurements on child carotid IMT films  
14 with random effects for rater and child to estimate between-child variance, between-rater  
15 variance, and residual error variance. These variance components were used to calculate  
16 within-rater and between-raters intraclass correlations (the ratio of explained variability to the  
17 total model variability), and within- and between-rater coefficients of variation (the standard  
18 deviation of measurement error divided by the mean).

19 Stata 14.2 (StataCorp, College Station, TX) was used in all analyses.

20 **Patient and Public Involvement:** Because LSAC is a population-based longitudinal study,  
21 no patient groups were involved in its design or conduct. To our knowledge, the public was  
22 not involved in the study design, recruitment or conduct of LSAC study or its CheckPoint  
23 module. Parents received a summary health report for their child and themselves at or soon  
24 after the assessment visit. They consented to take part knowing that they would not otherwise  
25 receive individual results about themselves or their child.

26

1  
2  
3 1 **RESULTS**

4 2 **Sample characteristics:** The recruitment and retention of participants in the Child Health  
5 3 CheckPoint are described in detail elsewhere.<sup>32</sup> Of the 1874 families who participated in  
6 4 CheckPoint assessment centres, we obtained carotid ultrasound images of analysable quality  
7 5 from 1489 children and 1476 parents (figure 1). The majority of excluded families undertook  
8 6 home visits, where carotid IMT could not be performed (n=378, 20.2%). Few data were lost  
9 7 due to poor quality images or inability to measure at the assessment centre (figure 1).

10 8 The sample characteristics of parents and children are outlined in table 1, stratified by sex.  
11  
12  
13  
14  
15  
16  
17  
18  
19  
20  
21  
22  
23  
24  
25  
26  
27  
28  
29  
30  
31  
32  
33  
34  
35  
36  
37  
38  
39  
40  
41  
42  
43  
44  
45  
46  
47  
48  
49  
50  
51  
52  
53  
54  
55  
56  
57  
58  
59  
60

**Table 1. Sample characteristics, stratified by sex, of children and parents.**

| Child Characteristics        | All  |       |      | Boys    |       |      | Girls   |       |      |
|------------------------------|------|-------|------|---------|-------|------|---------|-------|------|
|                              | N    | mean* | SD*  | N       | mean* | SD*  | N       | mean* | SD*  |
| Age, years                   | 1489 | 12.0  | 0.4  | 745     | 12.0  | 0.4  | 744     | 12.0  | 0.4  |
| Height, cm                   | 1488 | 153.2 | 7.9  | 744     | 152.5 | 8.0  | 744     | 153.9 | 7.8  |
| BMI, kg/m <sup>2</sup>       | 1488 | 19.4  | 3.6  | 744     | 19.3  | 3.5  | 744     | 19.6  | 3.6  |
| BMI z-score (CDC)            | 1488 | 0.37  | 1.02 | 744     | 0.37  | 1.02 | 744     | 0.37  | 1.01 |
| Waist, cm                    | 1488 | 66.6  | 8.7  | 744     | 67.3  | 8.8  | 744     | 65.8  | 8.5  |
| SBP, mmHg                    | 1371 | 108.6 | 8.0  | 673     | 108.4 | 7.8  | 698     | 108.9 | 8.2  |
| DBP, mmHg                    | 1371 | 63.1  | 5.6  | 673     | 62.7  | 5.7  | 698     | 63.5  | 5.4  |
| Disadvantage Index           | 1485 | 1010  | 63   | 742     | 1008  | 63   | 743     | 1011  | 63   |
| Lumen diameter, mm           | 1419 | 4.86  | 0.43 | 708     | 5.0   | 0.4  | 711     | 4.7   | 0.4  |
|                              | N    | n     | %*   | N       | n     | %*   | N       | n     | %*   |
| Diabetes                     | 1489 | 3     | 0.2  | 745     | 1     | 0.1  | 744     | 2     | 0.3  |
| Started puberty              | 1374 | 1234  | 90.7 | 700     | 591   | 84.4 | 674     | 643   | 95.4 |
| Pacemaker                    | 1489 | 0     | 0.0  | 745     | -     | -    | 744     | -     | -    |
| Exposed to second-hand smoke | 1489 | 298   | 26.6 | 745     | 152   | 26.9 | 744     | 146   | 26.2 |
| Parent Characteristics       | All  |       |      | Fathers |       |      | Mothers |       |      |
|                              | N    | mean* | SD*  | N       | mean* | SD*  | N       | mean* | SD*  |
| Age, years                   | 1476 | 43.7  | 5.5  | 195     | 46.2  | 7.0  | 1281    | 43.3  | 5.2  |
| Height, cm                   | 1474 | 166.1 | 7.8  | 195     | 177.8 | 7.6  | 1279    | 164.4 | 6.2  |
| BMI, kg/m <sup>2</sup>       | 1472 | 28.2  | 6.2  | 195     | 29.0  | 5.0  | 1277    | 28.07 | 6.4  |
| Waist, cm                    | 1468 | 87.4  | 14.4 | 194     | 98.1  | 13.3 | 1274    | 85.8  | 13.8 |
| SBP, mmHg                    | 1345 | 120.4 | 12.8 | 177     | 128.3 | 11.7 | 1168    | 119.2 | 12.6 |
| DBP, mmHg                    | 1345 | 73.86 | 8.7  | 177     | 78.2  | 8.5  | 1168    | 73.2  | 8.5  |
| Disadvantage Index           | 1472 | 1010  | 63   | 193     | 1004  | 72   | 1279    | 1011  | 62   |
| Lumen diameter, mm           | 1336 | 5.26  | 0.50 | 160     | 5.9   | 0.5  | 1176    | 5.2   | 0.4  |
|                              | N    | n     | %*   | N       | n     | %*   | N       | n     | %*   |
| Diabetes                     | 1476 | 31    | 2.6  | 195     | 9     | 7    | 1281    | 22    | 1.9  |
| Heart condition              | 1476 | 32    | 3.2  | 195     | 8     | 5.1  | 1281    | 24    | 2.9  |
| Pre-existing hypertension    | 1476 | 77    | 6.2  | 195     | 21    | 12.5 | 1281    | 56    | 5.3  |
| Pacemaker                    | 1476 | 2     | 0.1  | 195     | 0     | 0    | 1281    | 2     | 0.09 |



|                |      |     |      |     |    |      |      |     |      |
|----------------|------|-----|------|-----|----|------|------|-----|------|
| Current smoker | 1471 | 126 | 12.9 | 192 | 15 | 12.0 | 1279 | 111 | 13.0 |
| Ever smoker    | 1382 | 574 | 48.8 | 174 | 68 | 45.8 | 1208 | 506 | 49.2 |

\*weighted mean, standard deviation and percentage.

SD: standard deviation; CDC: Centers for Disease Control and Prevention; BMI: body mass index; SBP: systolic blood pressure; DBP: diastolic blood pressure; Disadvantage Index: the Index of Relative Socioeconomic Disadvantage; n: number of affected participants; N: number of participants in cohort with this measure (denominator).

For peer review only

1  
2  
3 1 The parent sample was predominantly mothers (n=1281, 86.8%) from a relatively  
4 2 socioeconomically advantaged background (mean Disadvantage Index score one tenth of a  
5 3 standard deviation above the national average). Approximately one in 10 parents reported a  
6 4 cardiovascular related health condition (diabetes, hypertension, heart condition, pace maker)  
7 5 (table 1).

11 6 In children, there were similar proportions of each sex. Age- and sex-specific BMI z-scores  
12 7 were 0.37 standard deviations above population reference values (table 1).

15 8 **Carotid intima-media thickness:** Summary statistics for child and parent carotid IMT are  
16 9 presented in table 2. Extended percentile values are found in supplementary table 1.

**Table 2. Distribution of carotid intima-media thickness, distensibility and elasticity in children and parents.**

| Child characteristics             | All  |        |         |             | Boys    |        |         |             | Girls   |        |         |             |
|-----------------------------------|------|--------|---------|-------------|---------|--------|---------|-------------|---------|--------|---------|-------------|
|                                   | N    | Mean   | SD      | 95% CI      | N       | Mean   | SD      | 95% CI      | N       | Mean   | SD      | 95% CI      |
| Far wall mean IMT, mm             | 1485 | 0.50   | 0.06    | 0.49 - 0.50 | 743     | 0.50   | 0.06    | 0.50 - 0.51 | 742     | 0.49   | 0.06    | 0.49 - 0.50 |
| Far wall maximum IMT, mm          | 1485 | 0.58   | 0.05    | 0.58 - 0.59 | 743     | 0.59   | 0.05    | 0.58 - 0.59 | 742     | 0.58   | 0.05    | 0.57 - 0.58 |
| Carotid artery distensibility, %  | 1419 | 17.4   | 3.2     | 17.2 - 17.6 | 708     | 17.1   | 3.0     | 16.8 - 17.3 | 711     | 17.7   | 3.3     | 17.4 - 18.0 |
| Carotid artery elasticity, %/mmHg | 1312 | 0.48   | 0.09    | 0.47 - 0.48 | 641     | 0.47   | 0.08    | 0.46 - 0.48 | 671     | 0.49   | 0.09    | 0.48 - 0.50 |
|                                   | N    | Median | IQR 25% | IQR 75%     | N       | Median | IQR 25% | IQR 75%     | N       | Median | IQR 25% | IQR 75%     |
| Far wall mean IMT, mm             | 1485 | 0.52   | 0.46    | 0.54        | 743     | 0.52   | 0.47    | 0.55        | 742     | 0.51   | 0.45    | 0.54        |
| Far wall maximum IMT, mm          | 1485 | 0.58   | 0.56    | 0.61        | 743     | 0.59   | 0.56    | 0.61        | 742     | 0.58   | 0.56    | 0.60        |
| Carotid artery distensibility, %  | 1419 | 17.13  | 15.3    | 19.17       | 708     | 16.9   | 15.1    | 18.9        | 711     | 17.4   | 15.5    | 19.4        |
| Carotid artery elasticity, %/mmHg | 1312 | 0.47   | 0.42    | 0.53        | 641     | 0.47   | 0.42    | 0.52        | 671     | 0.48   | 0.43    | 0.54        |
| Parent characteristics            | All  |        |         |             | Fathers |        |         |             | Mothers |        |         |             |
|                                   | N    | mean   | SD      | 95% CI      | N       | Mean   | SD      | 95% CI      | N       | Mean   | SD      | 95% CI      |
| Far wall mean IMT, mm             | 1468 | 0.57   | 0.07    | 0.56 - 0.57 | 195     | 0.61   | 0.11    | 0.59 - 0.63 | 1273    | 0.56   | 0.07    | 0.56 - 0.57 |
| Far wall maximum IMT, mm          | 1468 | 0.66   | 0.1     | 0.66 - 0.67 | 195     | 0.73   | 0.14    | 0.71 - 0.76 | 1273    | 0.65   | 0.08    | 0.65 - 0.66 |
| Carotid artery distensibility, %  | 1336 | 8.92   | 2.14    | 8.77 - 9.08 | 160     | 8.3    | 2.2     | 7.9 - 8.7   | 1176    | 9.0    | 2.1     | 8.9 - 9.2   |
| Carotid artery elasticity, %/mmHg | 1229 | 0.25   | 0.06    | 0.24 - 0.25 | 145     | 0.21   | 0.06    | 0.20 - 0.23 | 1084    | 0.25   | 0.06    | 0.25 - 0.26 |
|                                   | N    | median | IQR 25% | IQR 75%     | N       | Median | IQR 25% | IQR 75%     | N       | Median | IQR 25% | IQR 75%     |
| Far wall mean IMT, mm             | 1468 | 0.56   | 0.53    | 0.59        | 195     | 0.59   | 0.54    | 0.68        | 1273    | 0.55   | 0.53    | 0.58        |
| Far wall maximum IMT, mm          | 1468 | 0.64   | 0.6     | 0.71        | 195     | 0.72   | 0.62    | 0.83        | 1273    | 0.63   | 0.59    | 0.69        |
| Carotid artery distensibility, %  | 1336 | 8.73   | 7.47    | 10.31       | 160     | 8.2    | 6.9     | 9.7         | 1176    | 8.8    | 7.6     | 10.4        |
| Carotid artery elasticity, %/mmHg | 1229 | 0.24   | 0.21    | 0.28        | 145     | 0.21   | 0.18    | 0.24        | 1084    | 0.25   | 0.21    | 0.29        |

IMT: intima-media thickness; N: number of participants in cohort with this measure, SD: standard deviation; IQR: interquartile range.

1 Mean and maximum carotid IMT in children approximated a normal distribution (figure 3).  
2 Boys had marginally greater average mean and maximum carotid IMT than girls (0.50 vs  
3 0.49 mm for mean IMT). Mean carotid IMT values in children ranged from 0.31 to 0.65 mm,  
4 and maximum IMT values from 0.36 to 0.76 mm.

5 In parents, mean and maximum carotid IMT also approximated a normal distribution but with  
6 a larger positive skew. Men had substantially larger mean and maximum carotid IMT than  
7 women (0.61 vs 0.56 mm for mean IMT). Mean carotid IMT ranged from 0.35 to 0.98 mm,  
8 and maximum IMT ranged from 0.42 to 1.18 mm. Average parental carotid IMT was larger  
9 than child IMT (0.57 vs 0.50 mm for mean IMT).

10 **Other carotid artery functional measures:** Summary statistics for child and parent carotid  
11 artery distensibility and elasticity are shown in table 3. Extended percentile values are found  
12 in supplementary table 1. Values for both distensibility and elasticity both in children and  
13 parents approximated a normal distribution (figure 3). Boys had marginally less elastic  
14 arteries than girls, and men had substantially less elastic arteries than women (table 2).  
15 Distensibility values for children ranged from 5.8 to 32.2%, and elasticity values from 0.16 to  
16 0.81%/mmHg; for parents, distensibility values ranged from 3.1 to 19.1%, and elasticity  
17 values from 0.07 to 0.61%/mmHg.

18 **Parent-child concordance:** Small, positive correlations were seen in parent-child and  
19 mother-child analyses for all measures. For example, mother-child correlations were 0.12 and  
20 0.10 for far wall mean and maximum IMT respectively, and 0.19 and 0.11 for carotid artery  
21 distensibility and elasticity. None of the associations attenuated in adjusted linear regression  
22 models, suggesting that parent-child concordance was independent of age, sex, height of the  
23 child and age of the parent. The small father sample size (n=195, 13.2%) made sex  
24 comparisons difficult (table 3).

**Table 3. Parent-child concordance in weighted analyses.**

| Pearson's Correlation             | All parents |      |              | Mothers |      |              | Fathers |       |               |
|-----------------------------------|-------------|------|--------------|---------|------|--------------|---------|-------|---------------|
|                                   | N           | CC   | 95% CI       | N       | CC   | 95% CI       | N       | CC    | 95% CI        |
| Far wall mean IMT                 | 1437        | 0.09 | 0.02 to 0.16 | 1245    | 0.12 | 0.05 to 0.23 | 192     | 0.01  | -0.13 to 0.14 |
| Far wall maximum IMT              | 1437        | 0.08 | 0.01 to 0.15 | 1245    | 0.10 | 0.03 to 0.21 | 192     | 0.05  | -0.09 to 0.18 |
| Carotid artery distensibility     | 1255        | 0.18 | 0.10 to 0.23 | 1105    | 0.19 | 0.10 to 0.25 | 150     | 0.17  | -0.05 to 0.37 |
| Carotid artery elasticity         | 1133        | 0.11 | 0.03 to 0.19 | 1003    | 0.10 | 0.02 to 0.18 | 130     | 0.28  | 0.01 to 0.63  |
| Adjusted Linear Regression        | N           | ERC  | P value      | N       | ERC  | P value      | N       | ERC   | P value       |
| Far wall mean IMT, mm             | 1365        | 0.08 | 0.02         | 1183    | 0.11 | 0.004        | 182     | -0.01 | 0.88          |
| Far wall maximum IMT, mm          | 1365        | 0.04 | 0.05         | 1183    | 0.05 | 0.04         | 182     | 0.01  | 0.80          |
| Carotid artery distensibility, %  | 1249        | 0.27 | <0.001       | 1101    | 0.29 | <0.001       | 148     | 0.08  | 0.48          |
| Carotid artery elasticity, %/mmHg | 1127        | 0.16 | 0.002        | 999     | 0.15 | 0.004        | 128     | 0.25  | 0.13          |

\*Non-biological caregivers were excluded from these analyses (n=13).

Covariates in adjusted linear regression models include parent and child age, parent and child height, child lumen diameter (for carotid IMT only), Disadvantage Index and child sex.

Disadvantage Index: the Index of Relative Socioeconomic Disadvantage; IMT: intima-media thickness; N: number of participants in cohort with this measure, CC: correlation coefficient; ERC: estimated regression coefficient; CI: confidence interval.

1 **Reliability:** The within-observer coefficients of variation were 6.5% (95% CI 6.0 to 6.9%)  
2 and 4.9% (95% CI 4.6 to 5.2%) for mean and maximum carotid IMT values respectively, and  
3 the between-observer coefficients of variation were 9.5% (95% CI 7.5 to 11.5%) and 6.2%  
4 (95% CI 5.2 to 7.2%) respectively. Within-observer intraclass correlations were 0.71 (95% CI  
5 0.63 to 0.78) and 0.62 (95% CI 0.54 to 0.71) respectively. Between-observer intraclass  
6 correlations were 0.64 (95% CI 0.54 to 0.74) and 0.59 (95% CI 0.49 to 0.68).

## 7 8 **DISCUSSION**

9 **Principal findings:** We provide normative carotid IMT, distensibility and elasticity values  
10 for Australian 11-12-year-old children and their parents, together with parent-child  
11 concordance. Our results highlight that carotid IMT, distensibility and elasticity are  
12 approximately normally distributed in children, but that by middle age distributions become  
13 more skewed, potentially representing developing pathology. Mother-child concordances  
14 were modest but consistent, ranging from 0.10 to 0.19 for carotid IMT, distensibility and  
15 elasticity.

16 **Strengths and weaknesses:** This is the largest study to date to provide carotid IMT  
17 concordance data between children and their parents in a large population-based sample.  
18 Shared protocols between children and parents strengthens our conclusions about parent-child  
19 concordance. This is also the first major cohort study to identify the distribution of carotid  
20 IMT and other vascular measures in pre-adolescent children and mid-life parents specifically  
21 in Australia. The population-based sampling of this cohort suggest that the conclusions  
22 should generalise to the wider Australian child population. Similarities between the carotid  
23 IMT distributions in this study and those from international studies suggest our values may  
24 also be generalisable to other populations.<sup>22 45 46</sup> Finally, raters were blinded to participants'  
25 baseline characteristics, including age, weight, height, BMI and Disadvantage Score.

26 Potential limitations to the study include the relative mean social advantage of the  
27 participants, in keeping with attrition patterns common to many longitudinal studies. Survey  
28 weights minimise this bias, and the similarity between analyses with and without survey  
29 weights (data not shown) are reassuring. Secondly, relatively few fathers attended  
30 CheckPoint, which could lead to biased estimates, as the incidence of CVD and associated  
31 risk factors show strong sex differences.<sup>47</sup> However, the reported differences between  
32 mother-child and father-child concordance in our study are minimal and have some overlap  
33 in confidence intervals; this suggests a degree of consistency between father and mother

1 concordance. Thirdly, our cross-sectional data were not linked with longitudinal CVD  
2 outcomes; the relevance of carotid artery parameters in childhood are still unknown. Finally,  
3 the reliability of our carotid IMT analysis was modest, though comparable to other published  
4 results.<sup>22</sup> The inherent underlying error in measurement may have led to underestimating true  
5 associations.<sup>48</sup>

6 **Meaning and implications for clinicians and policy makers:** Our findings are consistent  
7 with the wider literature. In particular, our results almost exactly approximate those reported  
8 by Ryder et al of parent-offspring correlations in a US population ( $r=0.08$  for carotid IMT,  
9 Supplementary table 2).<sup>29</sup> Ryder's sibling-sibling correlations were marginally higher within  
10 the same cohort ( $r=0.11$ ), and were higher again, according to another study, in late middle  
11 age ( $r=0.36$ ).<sup>28</sup> This higher concordance between mid-life siblings may reflect smaller  
12 relative measurement error, because a fixed absolute measurement error becomes a smaller  
13 relative proportion of a measurement as IMT increases with age. Alternatively, it could  
14 reflect a cumulative effect of unspecified age-dependent exposures on carotid parameters.  
15 The accumulation of atheroma may have begun in childhood but may be a slow, lengthy  
16 process that becomes more apparent with increasing age. Age differences could also be a  
17 significant discriminating factor that obscures true parent-child concordance if this varies  
18 across the life cycle, especially for measures that are strongly correlated with age such as  
19 IMT. Improved estimates might be achieved if parents and children were measured at the  
20 same chronological age; however, this offers little help in understanding determinants of IMT  
21 in children now.

22 The lack of evidence of father-child concordance for any parameter may reflect (1) a true sex  
23 difference in parent-child concordance, (2) chance and/or lack of power (with only 195  
24 fathers in this sample), and/or (3) those fathers who attended CheckPoint not being  
25 representative of fathers of 11-12 year olds in general. Given the direction and magnitude of  
26 the point estimates we think (2) is most likely, but this can only be verified in further studies  
27 with larger numbers of fathers. Despite their similar number of fathers ( $n=186$ ), Ryder et al's  
28 findings<sup>29</sup> did contrast with ours in reporting a higher heritability statistic ( $h^2=41.5\%$ ) in  
29 father-offspring dyads than mother-offspring dyads ( $h^2=23.4\%$ ) in distensibility measures,  
30 which would also imply a higher correlation coefficient.

31 The relatively higher concordance in carotid artery distensibility ( $r=0.19$ ) compared to other  
32 measures suggests differences between structural and functional vascular measures.<sup>23 25</sup>  
33 Functional vascular measures such as carotid artery distensibility and elasticity are plausibly

1 more proximal on the causal pathway than structural vascular measures such as IMT. If  
2 functional vascular changes occurred before structural changes, or if they were more sensitive  
3 to environmental exposures, concordance may be evident at an earlier age. Additionally and  
4 as above, carotid IMT may be more sensitive to measurement errors than functional  
5 measures, potentially attenuating underlying associations.

6 **Unanswered questions and future research:** These data provide a reference for future  
7 studies of LSAC participants, which would ideally map the natural history of carotid IMT  
8 from childhood onwards. The predictive value of childhood carotid IMT for future carotid  
9 IMT and future CVD is uncertain - an important scientific and clinical knowledge gap,<sup>5</sup> given  
10 that this could inform prevention. It is possible that whilst the carotid IMT scores of middle-  
11 aged parents do not strongly predict the carotid IMT scores of their pre-adolescent children,  
12 parental values may predict the carotid IMT score of their children when they themselves  
13 reach middle-age. Research effort could also be directed to finding simpler and more accurate  
14 markers of early atherosclerosis that are less prone to measurement error.

15 In conclusion, we provide normative data of carotid IMT and related vascular measures for  
16 Australian 11-12-year-old children and their parents. Though modest, our demonstrated  
17 concordance - despite known measurement error and the large age difference - suggests a  
18 meaningful degree of heritability in carotid structure and function; the relative contributions  
19 of genetic and environmental underpinnings at different life stages remain to be parsed.

20



1 **ACKNOWLEDGEMENTS:** The Murdoch Children's Research Institute (MCRI)  
2 administered the research grant for the study and provided infrastructural support to its staff  
3 but played no role in the conduct or analysis of the trial. Research at the MCRI is supported  
4 by the Victorian Government's Operational Infrastructure Support Program.

5 The funding bodies had no role in relation to the design and conduct of the study; collection,  
6 management, analysis, and interpretation of the data; preparation, review, or approval of the  
7 manuscript; and decision to submit the manuscript for publication.

8 This paper uses unit record data from Growing Up in Australia, the Longitudinal Study of  
9 Australian Children. The study is conducted in partnership between the Department of Social  
10 Services (DSS), the Australian Institute of Family Studies (AIFS) and the Australian Bureau  
11 of Statistics (ABS). The findings and views reported in this paper are those of the author and  
12 should not be attributed to DSS, AIFS or the ABS.

13 REDCap (Research Electronic Data Capture) electronic data capture tools were used in this  
14 study. More information about this software can be found at: [www.project-redcap.org](http://www.project-redcap.org). We  
15 thank the LSAC and CheckPoint study participants, staff and students for their contributions.

16  
17 **COMPETING INTERESTS:** All authors have completed the ICMJE uniform disclosure  
18 form at [www.icmje.org/coi\\_disclosure.pdf](http://www.icmje.org/coi_disclosure.pdf) and declare financial support as described in the  
19 funding section. MW received support from Sandoz to present at a symposium outside the  
20 submitted work.

21  
22 **FUNDING:** This work was supported by the National Health and Medical Research Council  
23 (NHMRC) of Australia (1041352, 1109355), The Royal Children's Hospital Foundation  
24 (2014-241), Murdoch Children's Research Institute (MCRI), The University of Melbourne,  
25 National Heart Foundation of Australia (100660), Financial Markets Foundation for Children  
26 (2014-055) and the Victorian Deaf Education Institute. Research at the MCRI is supported by  
27 the Victorian Government's Operational Infrastructure Support Program.

28 The following authors were supported by the NHMRC: Postgraduate Scholarship (1114567)  
29 to RSL, Senior Research Fellowships to MW (1046518) and DPB (1064629). RSL is  
30 supported by an Australian Government Research Training Program Scholarship. MJ is  
31 supported by the Federal Research Grant of Finland to Turku University Hospital, Finnish  
32 Cardiovascular Foundation, Juho Vainio Foundation, Sigrid Juselius Foundation, Maud  
33 Kuistila Foundation, the Paulo Foundation, and the Murdoch Children's Research Institute  
34 (Dame Elizabeth Murdoch Fellowship). MW was supported by Cure Kids, New Zealand.

1  
2  
3  
4  
5  
6  
7  
8  
9  
10  
11  
12  
13  
14  
15  
16  
17  
18  
19  
20  
21  
22  
23  
24  
25  
26  
27  
28  
29  
30  
31  
32  
33  
34  
35  
36  
37  
38  
39  
40  
41  
42  
43  
44  
45  
46  
47  
48  
49  
50  
51  
52  
53  
54  
55  
56  
57  
58  
59  
60

1 DPB was supported by the National Heart Foundation of Australia: Honorary Future Leader  
2 Fellowship (100369).

3 The MCRI administered the research grants for the study and provided infrastructural support  
4 (IT and biospecimen management) to its staff and the study, but played no role in the conduct  
5 or analysis of the trial.

6 Personal fees were received by MW from the Australian Department of Social Services. MW  
7 received grants from NZ Ministry of Business, Innovation & Employment and A Better  
8 Start/Cure Kids NZ.

9 DSS played a role in study design; however, no other funding bodies had a role in the study  
10 design and conduct; data collection, management, analysis, and interpretation; preparation,  
11 review, or approval of the manuscript; and decision to submit the manuscript for publication.

12  
13 **CONTRIBUTIONS:** Richard S Liu, Sophie Dunn, David P Burgner contributed to study  
14 conception and interpretation of results, drafted the initial manuscript, critically revised  
15 further drafts and approved the final manuscript as submitted.

16 Anneke Grobler, Katherine Lange contributed interpretation of results, performed the  
17 statistical analysis, drafted the initial manuscript, critically revised further drafts and  
18 approved the final manuscript as submitted.

19 Denise Becker contributed to conception and interpretation of results of the reliability  
20 analysis, performed the statistical analysis, critically revised further drafts and approved the  
21 final manuscript as submitted.

22 Greta Goldsmith contributed to study conception, data collection and interpretation of results,  
23 critically revised further drafts and approved the final manuscript as submitted.

24 John Carlin, Markus Juonala, Melissa Wake contributed to study conception and  
25 interpretation of results, critically revised further drafts and approved the final manuscript as  
26 submitted.

27  
28 **DATA SHARING STATEMENT:** Dataset and technical documents are available from  
29 *Growing Up in Australia: The Longitudinal Study of Australian Children* via low-cost license  
30 for bone fide researchers. More information is available at [www.growingupinaustralia.gov.au](http://www.growingupinaustralia.gov.au)

31

1 **FIGURE CAPTIONS AND FOOTNOTES:**

2 **Figure 1.** Participant flow chart. n: number of families; c: number of children; p: number of  
3 attending adults; MAC: main assessment centre; mAC: mini assessment centre; HV: home  
4 visit assessment; LSAC: Longitudinal Study of Australian Children.

5 **Figure 2.** Sample single frame of ultrasound obtained in CheckPoint, with Carotid Analyzer  
6 analysis overlaid. Yellow lines indicate the lumen-intima interface, pink lines indicate the  
7 media-adventitia interface. The distance between yellow and pink lines in the lower pair of  
8 lines (far wall) is the carotid intima-media thickness. The carotid bulb characteristics are  
9 demonstrated in the left edge of the image.

10 **Figure 3.** Density plots for each primary and secondary carotid artery outcome. Males (blue),  
11 females (red), and both sexes (thin dotted black line) plotted on the same graph for each  
12 outcome. X and Y scales common between child and parent, and between mean and  
13 maximum IMT variables.

14

15 **SUPPLEMENTARY DOCUMENT DESCRIPTIONS:**

16 **Supplementary Table 1.** Percentile values for primary and secondary outcomes.

1  
2  
3  
4  
5  
6  
7  
8  
9  
10  
11  
12  
13  
14  
15  
16  
17  
18  
19  
20  
21  
22  
23  
24  
25  
26  
27  
28  
29  
30  
31  
32  
33  
34  
35  
36  
37  
38  
39  
40  
41  
42  
43  
44  
45  
46  
47  
48  
49  
50  
51  
52  
53  
54  
55  
56  
57  
58  
59  
60  
**1 REFERENCES**

1. Beaglehole R, Magnus P. The search for new risk factors for coronary heart disease: occupational therapy for epidemiologists? *Int J Epidemiol* 2002;**31**(6):1117-22; author reply 34-5.
2. Naghavi M, Wang HD, Lozano R, et al. Global, regional, and national age-sex specific all-cause and cause-specific mortality for 240 causes of death, 1990-2013: a systematic analysis for the Global Burden of Disease Study 2013. *Lancet* 2015;**385**(9963):117-71.
3. Baldassarre D, Amato M, Pustina L, et al. Measurement of carotid artery intima-media thickness in dyslipidemic patients increases the power of traditional risk factors to predict cardiovascular events. *Atherosclerosis* 2007;**191**(2):403-8.
4. Vernon ST, Coffey S, Bhindi R, et al. Increasing proportion of ST elevation myocardial infarction patients with coronary atherosclerosis poorly explained by standard modifiable risk factors. *Eur J Prev Cardiol* 2017:2047487317720287.
5. Urbina EM, Williams RV, Alpert BS, et al. Noninvasive assessment of subclinical atherosclerosis in children and adolescents: recommendations for standard assessment for clinical research: a scientific statement from the American Heart Association. *Hypertension* 2009;**54**(5):919-50.
6. Chambless LE, Folsom AR, Clegg LX, et al. Carotid wall thickness is predictive of incident clinical stroke: the Atherosclerosis Risk in Communities (ARIC) study. *Am J Epidemiol* 2000;**151**(5):478-87.
7. Lorenz MW, von Kegler S, Steinmetz H, et al. Carotid intima-media thickening indicates a higher vascular risk across a wide age range: prospective data from the Carotid Atherosclerosis Progression Study (CAPS). *Stroke* 2006;**37**(1):87-92.
8. O'Leary DH, Polak JF, Kronmal RA, et al. Carotid-artery intima and media thickness as a risk factor for myocardial infarction and stroke in older adults. *Cardiovascular Health Study Collaborative Research Group. N Engl J Med* 1999;**340**(1):14-22.
9. Salonen JT, Salonen R. Ultrasound B-mode imaging in observational studies of atherosclerotic progression. *Circulation* 1993;**87**(3 Suppl):II56-65.
10. van der Meer IM, Bots ML, Hofman A, et al. Predictive value of noninvasive measures of atherosclerosis for incident myocardial infarction: the Rotterdam Study. *Circulation* 2004;**109**(9):1089-94.
11. Rosvall M, Janzon L, Berglund G, et al. Incident coronary events and case fatality in relation to common carotid intima-media thickness. *J Intern Med* 2005;**257**(5):430-7.
12. Pignoli P, Tremoli E, Poli A, et al. Intimal plus medial thickness of the arterial wall: a direct measurement with ultrasound imaging. *Circulation* 1986;**74**(6):1399-406.
13. Persson J, Formgren J, Israelsson B, et al. Ultrasound-determined intima-media thickness and atherosclerosis. Direct and indirect validation. *Arterioscler Thromb* 1994;**14**(2):261-4.
14. Kablak-Ziembicka A, Tracz W, Przewlocki T, et al. Association of increased carotid intima-media thickness with the extent of coronary artery disease. *Heart* 2004;**90**(11):1286-90.
15. Lamotte C, Iliescu C, Libersa C, et al. Increased intima-media thickness of the carotid artery in childhood: a systematic review of observational studies. *Eur J Pediatr* 2011;**170**(6):719-29.
16. Hodis HN, Mack WJ, LaBree L, et al. The role of carotid arterial intima-media thickness in predicting clinical coronary events. *Ann Intern Med* 1998;**128**(4):262-9.
17. van den Oord SC, Sijbrands EJ, ten Kate GL, et al. Carotid intima-media thickness for cardiovascular risk assessment: systematic review and meta-analysis. *Atherosclerosis* 2013;**228**(1):1-11.

18. Stein JH, Korcarz CE, Hurst RT, et al. Use of carotid ultrasound to identify subclinical vascular disease and evaluate cardiovascular disease risk: a consensus statement from the American Society of Echocardiography Carotid Intima-Media Thickness Task Force. Endorsed by the Society for Vascular Medicine. *J Am Soc Echocardiogr* 2008;**21**(2):93-111; quiz 89-90.
19. Bots ML, Sutton-Tyrrell K. Lessons from the past and promises for the future for carotid intima-media thickness. *J Am Coll Cardiol* 2012;**60**(17):1599-604.
20. Liao D, Arnett DK, Tyroler HA, et al. Arterial stiffness and the development of hypertension. The ARIC study. *Hypertension* 1999;**34**(2):201-6.
21. Tentolouris N, Liatis S, Moyssakis I, et al. Aortic distensibility is reduced in subjects with type 2 diabetes and cardiac autonomic neuropathy. *Eur J Clin Invest* 2003;**33**(12):1075-83.
22. Doyon A, Kracht D, Bayazit AK, et al. Carotid artery intima-media thickness and distensibility in children and adolescents: reference values and role of body dimensions. *Hypertension* 2013;**62**(3):550-6.
23. Wiegman A, Hutten BA, de Groot E, et al. Efficacy and safety of statin therapy in children with familial hypercholesterolemia: a randomized controlled trial. *JAMA* 2004;**292**(3):331-7.
24. Woo KS, Chook P, Yu CW, et al. Effects of diet and exercise on obesity-related vascular dysfunction in children. *Circulation* 2004;**109**(16):1981-6.
25. Braamskamp M, Langslet G, McCrindle BW, et al. Effect of Rosuvastatin on Carotid Intima-Media Thickness in Children With Heterozygous Familial Hypercholesterolemia: The CHARON Study (Hypercholesterolemia in Children and Adolescents Taking Rosuvastatin Open Label). *Circulation* 2017;**136**(4):359-66.
26. Zhao J, Cheema FA, Bremner JD, et al. Heritability of carotid intima-media thickness: a twin study. *Atherosclerosis* 2008;**197**(2):814-20.
27. Sacco RL, Blanton SH, Slifer S, et al. Heritability and linkage analysis for carotid intima-media thickness: the family study of stroke risk and carotid atherosclerosis. *Stroke* 2009;**40**(7):2307-12.
28. Fox CS, Polak JF, Chazaro I, et al. Genetic and environmental contributions to atherosclerosis phenotypes in men and women: heritability of carotid intima-media thickness in the Framingham Heart Study. *Stroke* 2003;**34**(2):397-401.
29. Ryder JR, Pankratz ND, Dengel DR, et al. Heritability of Vascular Structure and Function: A Parent-Child Study. *J Am Heart Assoc* 2017;**6**(2).
30. Sanson A, Johnstone R, Consortium LR, et al. Project Team.(2004). Growing Up in Australia takes its first steps. *Family Matters*;**67**:46-52.
31. Edwards B. Growing up in Australia: the longitudinal study of Australian children: entering adolescence and becoming a young adult. *Family Matters* 2014(95):5.
32. Clifford S, Davies S, Wake M. Child Health CheckPoint: Cohort summary and methodology of a physical health and biospecimen module for the Longitudinal Study of Australian Children. **Submitted to BMJ Open October 2017.**
33. Wake M, Clifford S, York E, et al. Introducing growing up in Australia's child health check point: A physical health and biomarkers module for the longitudinal study of Australian children. *Family Matters* 2014(95):15.
34. Touboul PJ, Hennerici MG, Meairs S, et al. Mannheim carotid intima-media thickness and plaque consensus (2004-2006-2011). An update on behalf of the advisory board of the 3rd, 4th and 5th watching the risk symposia, at the 13th, 15th and 20th European Stroke Conferences, Mannheim, Germany, 2004, Brussels, Belgium, 2006, and Hamburg, Germany, 2011. *Cerebrovasc Dis* 2012;**34**(4):290-6.

- 1  
2  
3 1 35. Mancini GB, Abbott D, Kamimura C, et al. Validation of a new ultrasound method for  
4 2 the measurement of carotid artery intima medial thickness and plaque dimensions.  
5 3 Can J Cardiol 2004;**20**(13):1355-9.  
6 4 36. Dawson JD, Sonka M, Blecha MB, et al. Risk factors associated with aortic and carotid  
7 5 intima-media thickness in adolescents and young adults: the Muscatine Offspring  
8 6 Study. J Am Coll Cardiol 2009;**53**(24):2273-9.  
9 7 37. Marlatt KL, Kelly AS, Steinberger J, et al. The influence of gender on carotid artery  
10 8 compliance and distensibility in children and adults. J Clin Ultrasound  
11 9 2013;**41**(6):340-6.  
12 10 38. Koivisto T, Virtanen M, Hutri-Kahonen N, et al. Arterial pulse wave velocity in  
13 11 relation to carotid intima-media thickness, brachial flow-mediated dilation and carotid  
14 12 artery distensibility: the Cardiovascular Risk in Young Finns Study and the Health  
15 13 2000 Survey. Atherosclerosis 2012;**220**(2):387-93.  
16 14 39. Juonala M, Jarvisalo MJ, Maki-Torkko N, et al. Risk factors identified in childhood and  
17 15 decreased carotid artery elasticity in adulthood: the Cardiovascular Risk in Young  
18 16 Finns Study. Circulation 2005;**112**(10):1486-93.  
19 17 40. Bond L, Clements J, Bertalli N, et al. A comparison of self-reported puberty using the  
20 18 Pubertal Development Scale and the Sexual Maturation Scale in a school-based  
21 19 epidemiologic survey. Journal of Adolescence 2006;**29**(5):709-20.  
22 20 41. Kuczmarski RJ, Ogden CL, Grummer-Strawn LM, et al. CDC growth charts: United  
23 21 States. Adv Data 2000(314):1-27.  
24 22 42. Australian Bureau of S. Census of population and housing: Socio-Economic Indexes for  
25 23 Areas (SEIFA) 2011. Cat. no. 2033.0.55.001, 2011.  
26 24 43. Heeringa SG, West BT, Berglund PA. *Applied survey data analysis*: CRC Press, 2010.  
27 25 44. Ellul S, Mensah FK, Grobler A, et al. Technical Paper 1: Weighting and Non-Response.  
28 26 Melbourne: Murdoch Children's Research Institute, 2018.  
29 27 45. Jarvisalo MJ, Jartti L, Nanto-Salonen K, et al. Increased aortic intima-media thickness: a  
30 28 marker of preclinical atherosclerosis in high-risk children. Circulation  
31 29 2001;**104**(24):2943-7.  
32 30 46. Jourdan C, Wuhl E, Litwin M, et al. Normative values for intima-media thickness and  
33 31 distensibility of large arteries in healthy adolescents. J Hypertens 2005;**23**(9):1707-15.  
34 32 47. Maas AH, Appelman YE. Gender differences in coronary heart disease. Neth Heart J  
35 33 2010;**18**(12):598-602.  
36 34 48. Carroll RJ. Measurement error in epidemiologic studies. Encyclopedia of biostatistics  
37 35 1998.

36



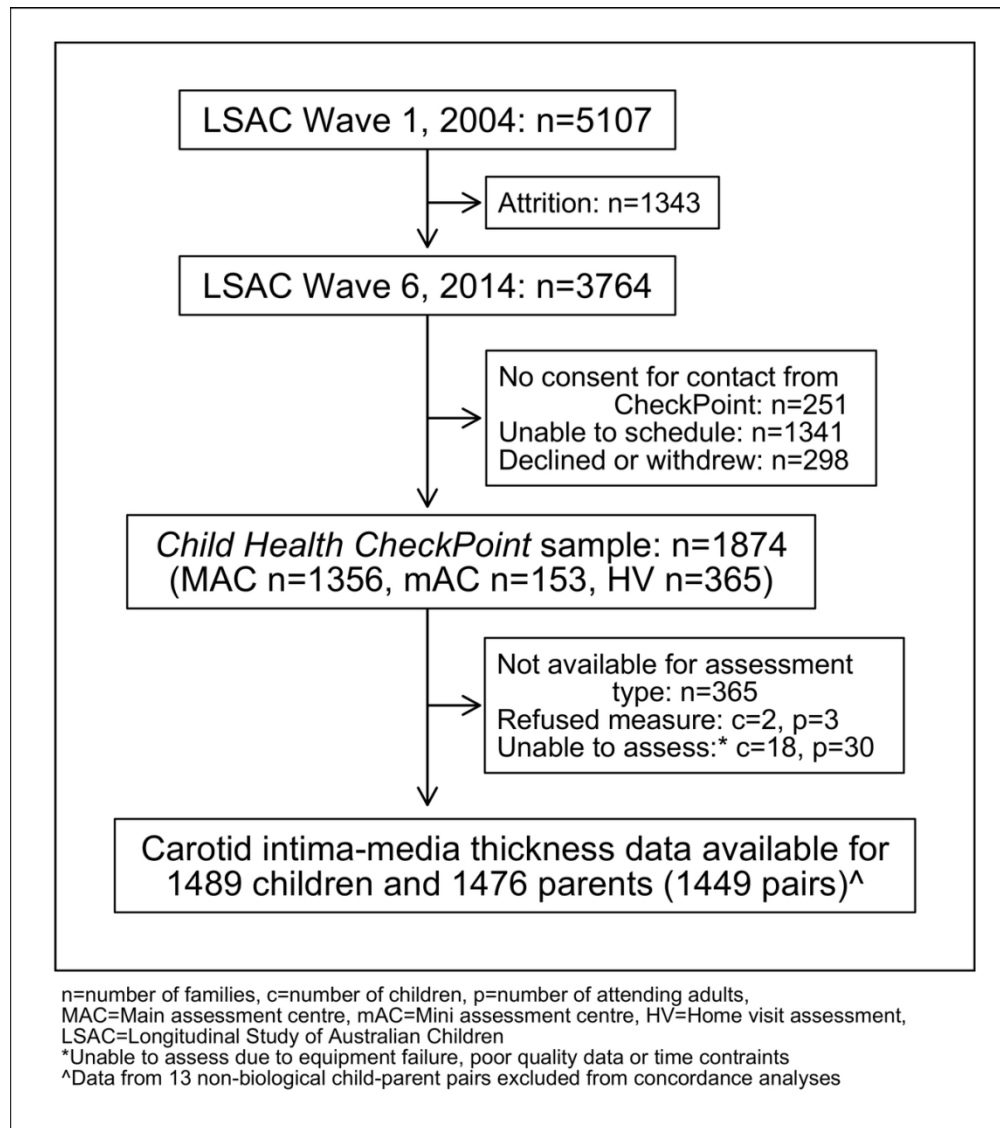

Figure 1. Participant flow chart. n: number of families; c: number of children; p: number of attending adults; MAC: main assessment centre; mAC: mini assessment centre; HV: home visit assessment; LSAC: Longitudinal Study of Australian Children.

57x64mm (600 x 600 DPI)

1  
2  
3  
4  
5  
6  
7  
8  
9  
10  
11  
12  
13  
14  
15  
16  
17  
18  
19  
20  
21  
22  
23  
24  
25  
26  
27  
28  
29  
30  
31  
32  
33  
34  
35  
36  
37  
38  
39  
40  
41  
42  
43  
44  
45  
46  
47  
48  
49  
50  
51  
52  
53  
54  
55  
56  
57  
58  
59  
60

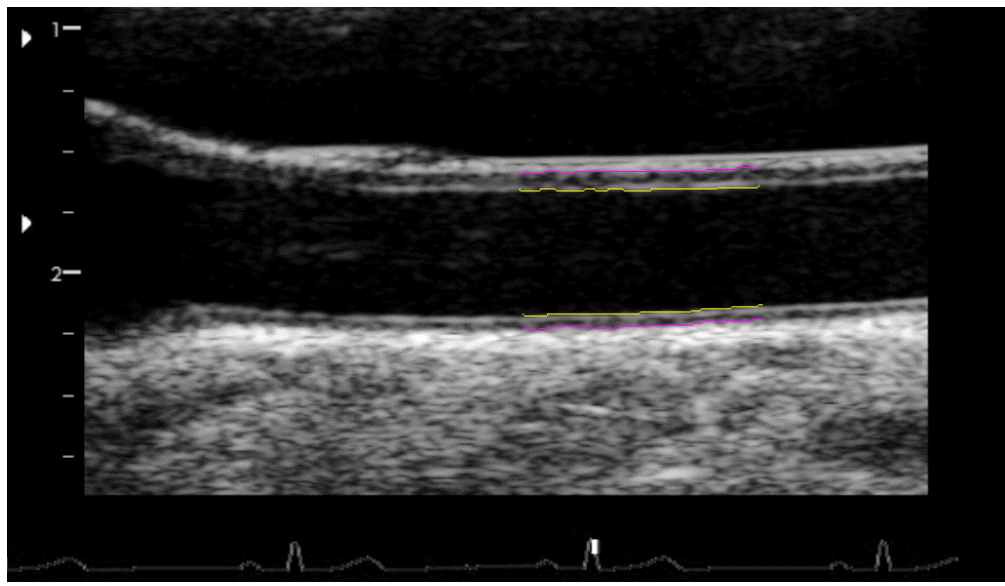

Sample single frame of ultrasound obtained in CheckPoint, with Carotid Analyzer analysis overlaid. Yellow lines indicate the lumen-intima interface, pink lines indicate the media-adventitia interface. The distance between yellow and pink lines in the lower pair of lines (far wall) is the carotid intima-media thickness. The carotid bulb characteristics are demonstrated in the left edge of the image.

82x47mm (300 x 300 DPI)



1  
2  
3  
4  
5  
6  
7  
8  
9  
10  
11  
12  
13  
14  
15  
16  
17  
18  
19  
20  
21  
22  
23  
24  
25  
26  
27  
28  
29  
30  
31  
32  
33  
34  
35  
36  
37  
38  
39  
40  
41  
42  
43  
44  
45  
46  
47  
48  
49  
50  
51  
52  
53  
54  
55  
56  
57  
58  
59  
60

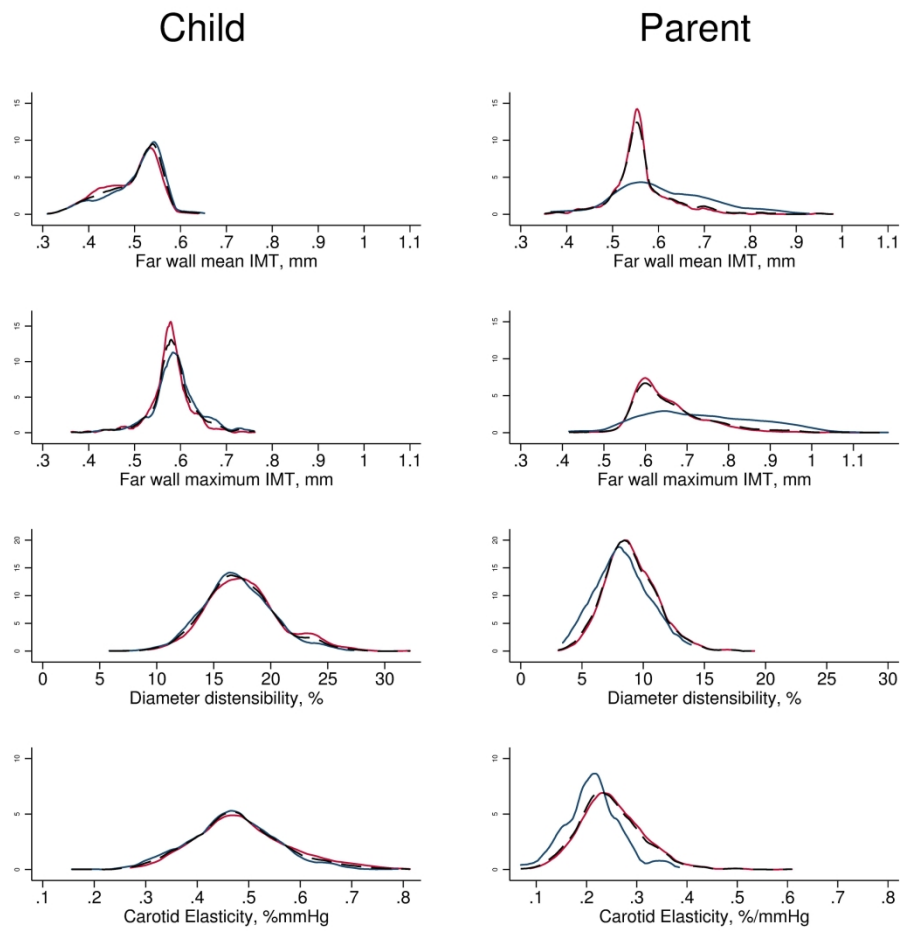

Density plots for each primary and secondary carotid artery outcome. Males (blue), females (red), and both sexes (thin dotted black line) plotted on the same graph for each outcome. X and Y scales common between child and parent, and between mean and maximum IMT variables.

254x254mm (300 x 300 DPI)

## SUPPLEMENTARY MATERIAL

### **Carotid artery intima-media thickness, distensibility, and elasticity: Population epidemiology and concordance in Australian 11-12 year old children and their parents**

**Authors:** Richard S Liu,<sup>\*1,2</sup> Sophie Dunn,<sup>\*2,3</sup> Anneke Grobler,<sup>2</sup> Katherine Lange,<sup>2</sup> Denise Becker,<sup>2,4</sup> Greta Goldsmith,<sup>2</sup> John Carlin,<sup>2,4</sup> Markus Juonala,<sup>5,6</sup> Melissa Wake,<sup>1,2,7</sup> David P Burgner<sup>1,2,8</sup>

\* RS Liu and S Dunn contributed equally to the study

**Affiliations:** <sup>1</sup>Department of Paediatrics, Faculty of Medicine, Dentistry and Health Services, The University of Melbourne, Parkville, Australia; <sup>2</sup>Murdoch Children's Research Institute, Royal Children's Hospital, Victoria, Australia; <sup>3</sup>Royal Children's Hospital, Parkville, Australia, <sup>4</sup>Melbourne School of Population and Global Health, Faculty of Medicine, Dentistry and Health Services, University of Melbourne, Parkville, Australia; <sup>5</sup>Department of Medicine, University of Turku, Turku, Finland; <sup>6</sup>Division of Medicine, Turku University Hospital, Turku, Finland; <sup>7</sup>Department of Paediatrics and the Liggins Institute, The University of Auckland, Auckland, New Zealand; <sup>8</sup>Department of Paediatrics, Monash University, Melbourne, Australia

Supplementary Table 1. Percentile values for primary and secondary outcomes.

| Characteristic                    | Child     |            |            |            |            |            |            | Parent    |            |            |            |            |            |            |
|-----------------------------------|-----------|------------|------------|------------|------------|------------|------------|-----------|------------|------------|------------|------------|------------|------------|
|                                   | P5        | P10        | P25        | P50        | P75        | P90        | P95        | P5        | P10        | P25        | P50        | P75        | P90        | P95        |
| <b>Far wall mean IMT, mm</b>      | <b>P5</b> | <b>P10</b> | <b>P25</b> | <b>P50</b> | <b>P75</b> | <b>P90</b> | <b>P95</b> | <b>P5</b> | <b>P10</b> | <b>P25</b> | <b>P50</b> | <b>P75</b> | <b>P90</b> | <b>P95</b> |
| Male                              | 0.382     | 0.404      | 0.472      | 0.520      | 0.546      | 0.560      | 0.566      | 0.454     | 0.502      | 0.540      | 0.592      | 0.684      | 0.744      | 0.816      |
| Female                            | 0.384     | 0.402      | 0.446      | 0.512      | 0.538      | 0.556      | 0.560      | 0.462     | 0.498      | 0.532      | 0.554      | 0.576      | 0.638      | 0.684      |
| All                               | 0.382     | 0.404      | 0.458      | 0.518      | 0.540      | 0.560      | 0.563      | 0.462     | 0.500      | 0.532      | 0.556      | 0.588      | 0.658      | 0.706      |
| <b>Far wall maximum IMT, mm</b>   | <b>P5</b> | <b>P10</b> | <b>P25</b> | <b>P50</b> | <b>P75</b> | <b>P90</b> | <b>P95</b> | <b>P5</b> | <b>P10</b> | <b>P25</b> | <b>P50</b> | <b>P75</b> | <b>P90</b> | <b>P95</b> |
| Male                              | 0.500     | 0.528      | 0.564      | 0.590      | 0.614      | 0.654      | 0.680      | 0.566     | 0.586      | 0.622      | 0.716      | 0.836      | 0.930      | 0.970      |
| Female                            | 0.504     | 0.530      | 0.560      | 0.580      | 0.598      | 0.628      | 0.646      | 0.562     | 0.572      | 0.594      | 0.630      | 0.688      | 0.768      | 0.812      |
| All                               | 0.502     | 0.528      | 0.562      | 0.580      | 0.606      | 0.640      | 0.666      | 0.564     | 0.574      | 0.596      | 0.638      | 0.706      | 0.796      | 0.858      |
| <b>Diameter distensibility, %</b> | <b>P5</b> | <b>P10</b> | <b>P25</b> | <b>P50</b> | <b>P75</b> | <b>P90</b> | <b>P95</b> | <b>P5</b> | <b>P10</b> | <b>P25</b> | <b>P50</b> | <b>P75</b> | <b>P90</b> | <b>P95</b> |
| Male                              | 12.4      | 13.2       | 15.1       | 16.8       | 19.0       | 21.0       | 22.1       | 4.7       | 5.4        | 6.9        | 8.1        | 9.5        | 11.0       | 11.9       |
| Female                            | 12.6      | 13.9       | 15.5       | 17.4       | 19.4       | 22.3       | 23.8       | 5.8       | 6.5        | 7.6        | 8.8        | 10.4       | 11.8       | 12.8       |
| All                               | 12.5      | 13.6       | 15.3       | 17.1       | 19.2       | 21.4       | 23.3       | 5.6       | 6.3        | 7.5        | 8.7        | 10.3       | 11.7       | 12.8       |
| <b>Carotid Elasticity, %/mmHg</b> | <b>P5</b> | <b>P10</b> | <b>P25</b> | <b>P50</b> | <b>P75</b> | <b>P90</b> | <b>P95</b> | <b>P5</b> | <b>P10</b> | <b>P25</b> | <b>P50</b> | <b>P75</b> | <b>P90</b> | <b>P95</b> |
| Male                              | 0.325     | 0.360      | 0.418      | 0.469      | 0.524      | 0.575      | 0.616      | 0.126     | 0.144      | 0.175      | 0.211      | 0.242      | 0.274      | 0.306      |
| Female                            | 0.349     | 0.376      | 0.427      | 0.479      | 0.542      | 0.620      | 0.660      | 0.156     | 0.177      | 0.209      | 0.246      | 0.291      | 0.335      | 0.362      |
| All                               | 0.339     | 0.368      | 0.422      | 0.472      | 0.532      | 0.596      | 0.645      | 0.151     | 0.171      | 0.207      | 0.242      | 0.285      | 0.332      | 0.355      |

IMT: intima-media thickness, PX: value of X<sup>th</sup> percentile, e.g. P50 = median

1  
2  
3  
4  
5  
6  
7  
8  
9  
10  
11  
12  
13  
14  
15  
16  
17  
18  
19  
20  
21  
22  
23  
24  
25  
26  
27  
28  
29  
30  
31  
32  
33  
34  
35  
36  
37  
38  
39  
40  
41  
42  
43  
44  
45  
46  
47

**Supplementary Table 2. Directly comparable parent-offspring Pearson’s correlation coefficients between the current study, and previously published literature.** For Ryder et al.,<sup>1</sup> Pearson correlations adjusted for age, sex, race, body mass index, mean arterial pressure, and smoking of both participants.

| Outcome                              | CheckPoint<br>(n=1255 to 1437) | Ryder et al. <sup>1</sup><br>(n=477) |
|--------------------------------------|--------------------------------|--------------------------------------|
| <b>Far wall maximum IMT</b>          | 0.08 (0.01, 0.15)              | 0.08 (p=0.08)                        |
| <b>Carotid artery distensibility</b> | 0.18 (0.18, 0.23)              | 0.19 (p<0.01)                        |

**References**

1. Ryder JR, Pankratz ND, Dengel DR, Pankow JS, Jacobs DR, Jr., Sinaiko AR, Gooty V and Steinberger J. Heritability of Vascular Structure and Function: A Parent-Child Study. *J Am Heart Assoc.* 2017;6.

For peer review only

**STROBE 2007 (v4) Statement—Checklist of items that should be included in reports of *cohort studies***

| Section/Topic            | Item # | Recommendation                                                                                                                                                                       | Reported on page # | Line numbers; (page) line;              |
|--------------------------|--------|--------------------------------------------------------------------------------------------------------------------------------------------------------------------------------------|--------------------|-----------------------------------------|
| Title and abstract       | 1      | (a) Indicate the study's design with a commonly used term in the title or the abstract                                                                                               | 1-2                | 1-3, 5-6                                |
|                          |        | (b) Provide in the abstract an informative and balanced summary of what was done and what was found                                                                                  | 2, 3               | (p2)9-12, (p3)1-3                       |
| <b>Introduction</b>      |        |                                                                                                                                                                                      |                    |                                         |
| Background/rationale     | 2      | Explain the scientific background and rationale for the investigation being reported                                                                                                 | 4                  | 3-18, 23-24, 26-27                      |
| Objectives               | 3      | State specific objectives, including any prespecified hypotheses                                                                                                                     | 5                  | 11-13                                   |
| <b>Methods</b>           |        |                                                                                                                                                                                      |                    |                                         |
| Study design             | 4      | Present key elements of study design early in the paper                                                                                                                              | 5                  | 18                                      |
| Setting                  | 5      | Describe the setting, locations, and relevant dates, including periods of recruitment, exposure, follow-up, and data collection                                                      | 5, 6               | (p5) 18-29<br>(p6) 4-15                 |
| Participants             | 6      | (a) Give the eligibility criteria, and the sources and methods of selection of participants. Describe methods of follow-up                                                           | 5                  | 18-22                                   |
|                          |        | (b) For matched studies, give matching criteria and number of exposed and unexposed                                                                                                  | NA                 | NA                                      |
| Variables                | 7      | Clearly define all outcomes, exposures, predictors, potential confounders, and effect modifiers. Give diagnostic criteria, if applicable                                             | 7-9                | (p7)17-21, 23-36; (p8) 4-14; (p9) 10-16 |
| Data sources/measurement | 8*     | For each variable of interest, give sources of data and details of methods of assessment (measurement). Describe comparability of assessment methods if there is more than one group | 6-9                | All                                     |
| Bias                     | 9      | Describe any efforts to address potential sources of bias                                                                                                                            | 9                  | 22-27                                   |
| Study size               | 10     | Explain how the study size was arrived at                                                                                                                                            | 5                  | 23-29                                   |
| Quantitative variables   | 11     | Explain how quantitative variables were handled in the analyses. If applicable, describe which groupings were chosen and why                                                         | 7-9                |                                         |
| Statistical methods      | 12     | (a) Describe all statistical methods, including those used to control for confounding                                                                                                | 9                  | 10-27                                   |
|                          |        | (b) Describe any methods used to examine subgroups and interactions                                                                                                                  | 9                  | 12-21                                   |
|                          |        | (c) Explain how missing data were addressed                                                                                                                                          | 9                  | 17-21                                   |

|                          |     |                                                                                                                                                                                                              |                                                  |                          |
|--------------------------|-----|--------------------------------------------------------------------------------------------------------------------------------------------------------------------------------------------------------------|--------------------------------------------------|--------------------------|
|                          |     | (d) If applicable, explain how loss to follow-up was addressed                                                                                                                                               | 9                                                | 17-21                    |
|                          |     | (e) Describe any sensitivity analyses                                                                                                                                                                        | NA                                               | NA                       |
| <b>Results</b>           |     |                                                                                                                                                                                                              |                                                  |                          |
| Participants             | 13* | (a) Report numbers of individuals at each stage of study—eg numbers potentially eligible, examined for eligibility, confirmed eligible, included in the study, completing follow-up, and analysed            | Figure 1                                         | Additional document      |
|                          |     | (b) Give reasons for non-participation at each stage                                                                                                                                                         | Figure 1                                         | Additional document      |
|                          |     | (c) Consider use of a flow diagram                                                                                                                                                                           | Figure 1                                         | Additional document      |
| Descriptive data         | 14* | (a) Give characteristics of study participants (eg demographic, clinical, social) and information on exposures and potential confounders                                                                     | Table 1, page 11                                 | NA                       |
|                          |     | (b) Indicate number of participants with missing data for each variable of interest                                                                                                                          | Figure 1<br>Table 1, page 11<br>Table 2, page 14 | Add document<br>NA<br>NA |
|                          |     | (c) Summarise follow-up time (eg, average and total amount)                                                                                                                                                  | NA                                               | NA                       |
| Outcome data             | 15* | Report numbers of outcome events or summary measures over time                                                                                                                                               | Table 2, page 14                                 | NA                       |
| Main results             | 16  | (a) Give unadjusted estimates and, if applicable, confounder-adjusted estimates and their precision (eg, 95% confidence interval). Make clear which confounders were adjusted for and why they were included | Table 2, page 14                                 | NA                       |
|                          |     | (b) Report category boundaries when continuous variables were categorized                                                                                                                                    | Table 2, page 14                                 | NA                       |
|                          |     | (c) If relevant, consider translating estimates of relative risk into absolute risk for a meaningful time period                                                                                             | NA                                               | NA                       |
| Other analyses           | 17  | Report other analyses done—eg analyses of subgroups and interactions, and sensitivity analyses                                                                                                               | Table 3, page 16<br>+ page 17                    | NA                       |
| <b>Discussion</b>        |     |                                                                                                                                                                                                              |                                                  |                          |
| Key results              | 18  | Summarise key results with reference to study objectives                                                                                                                                                     | 17                                               | 10-15                    |
| <b>Limitations</b>       |     |                                                                                                                                                                                                              |                                                  |                          |
| Interpretation           | 20  | Give a cautious overall interpretation of results considering objectives, limitations, multiplicity of analyses, results from similar studies, and other relevant evidence                                   | 18-19                                            | (p18) 8-32; (p19) 106    |
| Generalisability         | 21  | Discuss the generalisability (external validity) of the study results                                                                                                                                        | 18-19                                            | (p18) 8-21,<br>(p19)8-16 |
| <b>Other information</b> |     |                                                                                                                                                                                                              |                                                  |                          |

|         |    |                                                                                                                                                               |       |                           |
|---------|----|---------------------------------------------------------------------------------------------------------------------------------------------------------------|-------|---------------------------|
| Funding | 22 | Give the source of funding and the role of the funders for the present study and, if applicable, for the original study on which the present article is based | 20-21 | (p20) 20-30;<br>P(21) 1-8 |
|---------|----|---------------------------------------------------------------------------------------------------------------------------------------------------------------|-------|---------------------------|

\*Give information separately for cases and controls in case-control studies and, if applicable, for exposed and unexposed groups in cohort and cross-sectional studies.

**Note:** An Explanation and Elaboration article discusses each checklist item and gives methodological background and published examples of transparent reporting. The STROBE checklist is best used in conjunction with this article (freely available on the Web sites of PLoS Medicine at <http://www.plosmedicine.org/>, Annals of Internal Medicine at <http://www.annals.org/>, and Epidemiology at <http://www.epidem.com/>). Information on the STROBE Initiative is available at [www.strobe-statement.org](http://www.strobe-statement.org).
