# Supplementary material for: Carotid artery intima–media thickness, distensibility and elasticity: population epidemiology and concordance in Australian children aged 11–12 years old and their parents
Source: PubMed Central journal article supplement — BMJ Open. 2019 Jul 4;9(Suppl 3):23–33. doi: 10.1136/bmjopen-2017-020264 (PMC6624035; doi:10.1136/bmjopen-2017-020264), 2019-07-04
Supplement: bmjopen-2017-020264supp001.pdf [file bmjopen-2017-020264supp001.pdf]

## **SUPPLEMENTARY MATERIAL**

### **Carotid artery intima-media thickness, distensibility, and elasticity: Population epidemiology and concordance in Australian 11-12 year old children and their parents**

**Authors:** Richard S Liu,<sup>\*1,2</sup> Sophie Dunn,<sup>\*2,3</sup> Anneke Grobler,<sup>2</sup> Katherine Lange,<sup>2</sup> Denise Becker,<sup>2,4</sup> Greta Goldsmith,<sup>2</sup> John Carlin,<sup>2,4</sup> Markus Juonala,<sup>5,6</sup> Melissa Wake,<sup>1,2,7</sup> David P Burgner<sup>1,2,8</sup>

\* RS Liu and S Dunn contributed equally to the study

**Affiliations:** <sup>1</sup>Department of Paediatrics, Faculty of Medicine, Dentistry and Health Services, The University of Melbourne, Parkville, Australia; <sup>2</sup>Murdoch Children's Research Institute, Royal Children's Hospital, Victoria, Australia; <sup>3</sup>Royal Children's Hospital, Parkville, Australia; <sup>4</sup>Melbourne School of Population and Global Health, Faculty of Medicine, Dentistry and Health Services, University of Melbourne, Parkville, Australia; <sup>5</sup>Department of Medicine, University of Turku, Turku, Finland; <sup>6</sup>Division of Medicine, Turku University Hospital, Turku, Finland; <sup>7</sup>Department of Paediatrics and the Liggins Institute, The University of Auckland, Auckland, New Zealand; <sup>8</sup>Department of Paediatrics, Monash University, Melbourne, Australia

**Supplementary Table 1. Percentile values for primary and secondary outcomes.**

| Characteristic                    | Child     |            |            |            |            |            |            | Parent    |            |            |            |            |            |            |
|-----------------------------------|-----------|------------|------------|------------|------------|------------|------------|-----------|------------|------------|------------|------------|------------|------------|
|                                   | P5        | P10        | P25        | P50        | P75        | P90        | P95        | P5        | P10        | P25        | P50        | P75        | P90        | P95        |
| <b>Far wall mean IMT, mm</b>      | <b>P5</b> | <b>P10</b> | <b>P25</b> | <b>P50</b> | <b>P75</b> | <b>P90</b> | <b>P95</b> | <b>P5</b> | <b>P10</b> | <b>P25</b> | <b>P50</b> | <b>P75</b> | <b>P90</b> | <b>P95</b> |
| Male                              | 0.382     | 0.404      | 0.472      | 0.520      | 0.546      | 0.560      | 0.566      | 0.454     | 0.502      | 0.540      | 0.592      | 0.684      | 0.744      | 0.816      |
| Female                            | 0.384     | 0.402      | 0.446      | 0.512      | 0.538      | 0.556      | 0.560      | 0.462     | 0.498      | 0.532      | 0.554      | 0.576      | 0.638      | 0.684      |
| All                               | 0.382     | 0.404      | 0.458      | 0.518      | 0.540      | 0.560      | 0.563      | 0.462     | 0.500      | 0.532      | 0.556      | 0.588      | 0.658      | 0.706      |
| <b>Far wall maximum IMT, mm</b>   | <b>P5</b> | <b>P10</b> | <b>P25</b> | <b>P50</b> | <b>P75</b> | <b>P90</b> | <b>P95</b> | <b>P5</b> | <b>P10</b> | <b>P25</b> | <b>P50</b> | <b>P75</b> | <b>P90</b> | <b>P95</b> |
| Male                              | 0.500     | 0.528      | 0.564      | 0.590      | 0.614      | 0.654      | 0.680      | 0.566     | 0.586      | 0.622      | 0.716      | 0.836      | 0.930      | 0.970      |
| Female                            | 0.504     | 0.530      | 0.560      | 0.580      | 0.598      | 0.628      | 0.646      | 0.562     | 0.572      | 0.594      | 0.630      | 0.688      | 0.768      | 0.812      |
| All                               | 0.502     | 0.528      | 0.562      | 0.580      | 0.606      | 0.640      | 0.666      | 0.564     | 0.574      | 0.596      | 0.638      | 0.706      | 0.796      | 0.858      |
| <b>Diameter distensibility, %</b> | <b>P5</b> | <b>P10</b> | <b>P25</b> | <b>P50</b> | <b>P75</b> | <b>P90</b> | <b>P95</b> | <b>P5</b> | <b>P10</b> | <b>P25</b> | <b>P50</b> | <b>P75</b> | <b>P90</b> | <b>P95</b> |
| Male                              | 12.4      | 13.2       | 15.1       | 16.8       | 19.0       | 21.0       | 22.1       | 4.7       | 5.4        | 6.9        | 8.1        | 9.5        | 11.0       | 11.9       |
| Female                            | 12.6      | 13.9       | 15.5       | 17.4       | 19.4       | 22.3       | 23.8       | 5.8       | 6.5        | 7.6        | 8.8        | 10.4       | 11.8       | 12.8       |
| All                               | 12.5      | 13.6       | 15.3       | 17.1       | 19.2       | 21.4       | 23.3       | 5.6       | 6.3        | 7.5        | 8.7        | 10.3       | 11.7       | 12.8       |
| <b>Carotid Elasticity, %/mmHg</b> | <b>P5</b> | <b>P10</b> | <b>P25</b> | <b>P50</b> | <b>P75</b> | <b>P90</b> | <b>P95</b> | <b>P5</b> | <b>P10</b> | <b>P25</b> | <b>P50</b> | <b>P75</b> | <b>P90</b> | <b>P95</b> |
| Male                              | 0.325     | 0.360      | 0.418      | 0.469      | 0.524      | 0.575      | 0.616      | 0.126     | 0.144      | 0.175      | 0.211      | 0.242      | 0.274      | 0.306      |
| Female                            | 0.349     | 0.376      | 0.427      | 0.479      | 0.542      | 0.620      | 0.660      | 0.156     | 0.177      | 0.209      | 0.246      | 0.291      | 0.335      | 0.362      |
| All                               | 0.339     | 0.368      | 0.422      | 0.472      | 0.532      | 0.596      | 0.645      | 0.151     | 0.171      | 0.207      | 0.242      | 0.285      | 0.332      | 0.355      |

IMT: intima-media thickness, PX: value of X<sup>th</sup> percentile, e.g. P50 = median

**Supplementary Table 2. Directly comparable parent-offspring Pearson's correlation coefficients between the current study, and previously published literature.** For Ryder et al.,<sup>1</sup> Pearson correlations adjusted for age, sex, race, body mass index, mean arterial pressure, and smoking of both participants.

| Outcome                              | CheckPoint<br>(n=1255 to 1437) | Ryder et al. <sup>1</sup><br>(n=477) |
|--------------------------------------|--------------------------------|--------------------------------------|
| <b>Far wall maximum IMT</b>          | 0.08 (0.01, 0.15)              | 0.08 (p=0.08)                        |
| <b>Carotid artery distensibility</b> | 0.18 (0.18, 0.23)              | 0.19 (p<0.01)                        |

### References

1. Ryder JR, Pankratz ND, Dengel DR, Pankow JS, Jacobs DR, Jr., Sinaiko AR, Gooty V and Steinberger J. Heritability of Vascular Structure and Function: A Parent-Child Study. *J Am Heart Assoc.* 2017;6.
